# Supplementary material for: Design, Synthesis, Kinetic Analysis and Pharmacophore-Directed Discovery of 3-Ethylaniline Hybrid Imino-Thiazolidinone as Potential Inhibitor of Carbonic Anhydrase II: An Emerging Biological Target for Treatment of Cancer
Source: MDPI journal article supplement (doi:10.3390/biom12111696), 2022-11-16
Supplement: s1 [file s1]

## **Supporting information**

Atteeque Ahmed<sup>1</sup>, Mubashir Aziz<sup>2</sup>, Syeda Abida Ejaz<sup>2\*</sup>, Pervaiz Ali Channar<sup>3</sup>, Aamer Saeed<sup>1\*</sup>, Seema Zargar<sup>4</sup>, Tanveer A. Wani<sup>5</sup>, Asad Hamad,<sup>6</sup> Qamar Abbas<sup>7</sup>, Hussain Raza<sup>8</sup>, Song Ja Kim<sup>8</sup>

<sup>1</sup>*Department of Chemistry, Quaid-I-Azam University, Islamabad 45320, Pakistan.*

<sup>2</sup>*Department of Pharmaceutical Chemistry, Faculty of Pharmacy, The Islamia University of Bahawalpur, Bahawalpur-63100, Pakistan.*

<sup>3</sup>*Department of Basic Sciences and Humanities, Faculty of Information Science and Humanities, Dawood University of Engineering and Technology, Karachi 74800, Pakistan*

<sup>4</sup>*Department of Biochemistry, College of Science, King Saud University, P.O. Box 22452, Riyadh 11451, Saudi Arabia*

<sup>5</sup>*Department of Pharmaceutical Chemistry, College of Pharmacy, King Saud University, P.O. Box 2457, Riyadh 11451, Saudi Arabia*

<sup>6</sup> *Faculty of Pharmacy, Grand Asian University Sialkot, 51310, Punjab, Pakistan.*

<sup>7</sup>*Department of Biology, College of Science, University of Bahrain, Sakhir-32038, Kingdom of Bahrain.*

<sup>8</sup>*College of Natural Sciences, Department of Biological Sciences, Kongju National University, Gongju-32588, Republic of Korea.*

### ***\*Corresponding Authors:***

Aamer Saeed; Email: asaeed@qau.edu.pk, aamersaeed@yahoo.com;

Syeda Abida Ejaz; abida.ejaz@iub.edu.pk; abidaejaz2010@gmail.com

### **To whom correspondences should address:**

*Dr. Syeda Abida Ejaz; Department of Pharmaceutical Chemistry, Faculty of Pharmacy, The Islamia University of Bahawalpur, Pakistan., Postal Code 63100, Pakistan Tel: +92-062-9250245 Fax: +92-062-9250245, E-Mail: abida.ejaz@iub.edu.pk; abidaejaz2010@gmail.com*

***Ethyl(Z)-2-((Z)-3-(3-ethylphenyl)-2-((2-methylbenzoyl)imino)-4-oxothiazolidin-5-ylidene)acetate (6a)***

White solid Yield: 83%;  $R_f$ : 0.61: m.p. 235-237°C; **FTIR**: 2974.45 (C-H aliphatic, asymmetric,  $sp^3$ ), 2928.12 (C-H aliphatic, symmetric,  $sp^3$ ), 1733.34, 1695.13, 1649.57 (3C=O), 1538.82 (N=C), 1191 (C-S)  $cm^{-1}$ .  **$^1H$  NMR** (300 MHz,  $CDCl_3$ )  $\delta$  7.96 (dd,  $J = 7.8, 1.5$  Hz, 1H), 7.49 (t,  $J = 7.7$  Hz, 1H), 7.38 (qd,  $J = 6.8, 3.0$  Hz, 2H), 7.23 (dq,  $J = 8.0, 3.2$  Hz, 3H), 7.16 (t,  $J = 7.9$  Hz, 1H), 7.09 (s, 1H), 4.38 (q,  $J = 7.1$  Hz, 2H,  $CH_2$ ), 2.77 (q,  $J = 7.6$  Hz, 2H,  $CH_2$ ), 2.61 (s, 3H,  $CH_3$ ), 1.36 (dt,  $J = 25.0, 7.4$  Hz, 6H,  $(CH_3)_2$ ).  **$^{13}C$  NMR** (75 MHz,  $CDCl_3$ )  $\delta$  178.3 (C=O), 165.2 (C=O), 165.0 (C=O), 164.8, 145.6, 141.6, 140.9, 134.1, 133.4, 132.7, 132.1, 131.9, 129.1, 129.0, 127.1, 125.6, 124.8, 120.6, 61.9 ( $CH_2$ ), 28.6 ( $CH_2$ ), 22.4 ( $CH_3$ ), 15.3 ( $CH_3$ ), 14.2 ( $CH_3$ ). Anal. calcd. For  $C_{23}H_{22}N_2O_4S$  (422.13): C, 65.39, H, 5.25, N, 6.63, O, 15.15, S, 7.59. Found: C, 65.37, H, 5.22, N, 6.60, S, 7.57. GC-MS (ESI)  $m/z = 422.0$ .

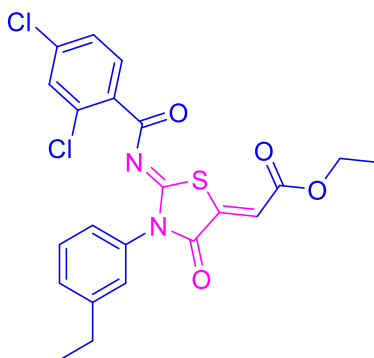

***Ethyl(Z)-2-((Z)-2-((2,4-dichlorobenzoyl)imino)-3-(3-ethylphenyl)-4-oxothiazolidin-5-ylidene)acetate (6b)***

White solid Yield: 87%;  $R_f$ : 0.49: m.p. 235-237°C; **FTIR**: 2971.62 (C-H aliphatic, asymmetric,  $sp^3$ ), 2929.47 (C-H aliphatic, symmetric,  $sp^3$ ), 1736.53, 1702.44, 1649.79 (3C=O), 1532.63 (N=C), 1185.35 (C-S)  $cm^{-1}$ .  **$^1H$  NMR** (300 MHz,  $CDCl_3$ )  $\delta$  7.85 (d,  $J = 8.5$  Hz, 1H), 7.45 (d,  $J = 8.5$  Hz,

2H), 7.39 – 7.25 (m, 1H), 7.24 – 7.08 (m, 2H), 4.38 (q,  $J = 7.2$  Hz, 2H, CH<sub>2</sub>), 2.75 (q,  $J = 7.7$  Hz, 2H, CH<sub>2</sub>), 1.35 (dt,  $J = 29.2, 7.4$  Hz, 6H, (CH<sub>3</sub>)<sub>2</sub>). **<sup>13</sup>C NMR** (75 MHz, CDCl<sub>3</sub>)  $\delta$  175.1(C=O), 167.2(C=O), 165.0(C=O), 164.9, 145.6, 140.2, 138.7, 135.8, 133.9, 133.8, 131.7, 131.2, 129.1, 127.0, 126.8, 124.8, 121.5, 62.1(CH<sub>2</sub>), 28.6(CH<sub>2</sub>), 15.3(CH<sub>3</sub>), 14.2(CH<sub>3</sub>). Anal. calcd. For C<sub>22</sub>H<sub>18</sub>Cl<sub>2</sub>N<sub>3</sub>O<sub>4</sub>S (476.03): C, 55.36, H, 3.80, Cl, 14.85, N, 5.87, O, 13.41, S, 6.72. Found: C, 55.33, H, 3.79, N, 5.85, S, 6.72. GC-MS (ESI<sup>-</sup>)  $m/z = 476.01$

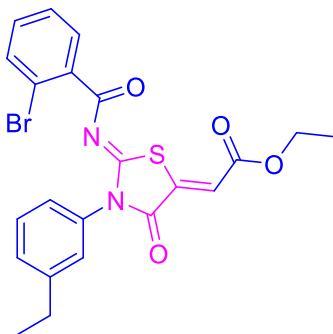

***Ethyl(Z)-2-((Z)-2-((3-bromobenzoyl)imino)-3-(3-ethylphenyl)-4-oxothiazolidin-5-ylidene)acetate (6c)***

White solid Yield: 80%; R<sub>f</sub>: 0.55; m.p. 235-237°C; **FTIR**: 2966.12 (C-H aliphatic stretch), 1686.18(C=O), 1538.82 (N=C), 1156.93 (C-S) cm<sup>-1</sup>.

**<sup>1</sup>H NMR** (300 MHz, DMSO-*d*<sub>6</sub>)  $\delta$  7.64 – 7.55 (m, 1H), 7.44 (t,  $J = 8.1$  Hz, 1H), 7.33 (dd,  $J = 5.8, 3.5$  Hz, 3H), 7.14 (d,  $J = 6.0$  Hz, 2H), 7.00 – 6.88 (m, 1H), 6.78 (s, 1H), 4.25 (q,  $J = 7.0$  Hz, 2H, CH<sub>2</sub>), 2.64 (q,  $J = 7.6$  Hz, 2H, CH<sub>2</sub>), 1.23 (dt,  $J = 31.4, 7.4$  Hz, 6H, (CH<sub>3</sub>)<sub>2</sub>). **<sup>13</sup>C NMR** (75 MHz, DMSO-*d*<sub>6</sub>)  $\delta$  166.5(C=O), 166.4(C=O), 163.4(C=O), 147.2, 145.1, 137.4, 134.8, 133.3, 131.9, 129.5, 129.4, 128.6, 127.7, 127.4, 125.5, 119.3, 112.9, 106.5, 61.5(CH<sub>2</sub>), 51.3(CH<sub>2</sub>), 15.9(CH<sub>3</sub>), 14.5(CH<sub>3</sub>). Anal. calcd. For C<sub>22</sub>H<sub>19</sub>BrN<sub>2</sub>O<sub>4</sub>S (486.0249): C, 54.22, H, 3.93, Br, 16.40, N, 5.75, O, 13.13, S, 6.58. Found: C, 54.20, H, 3.90, N, 5.73, S, 6.53. GC-MS (ESI<sup>-</sup>)  $m/z = 486.0$

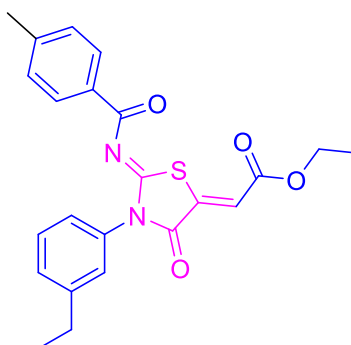

***Ethyl(Z)-2-((Z)-3-(3-ethylphenyl)-2-((4-methylbenzoyl)imino)-4-oxothiazolidin-5-ylidene)acetate(6d)***

White solid Yield: 85%;  $R_f$ : 0.57; m.p. 235-237°C; **FTIR**: 2955.61 (C-H aliphatic stretch), 1736.18, 1702.71, 1640.34(3C=O), 1537.10 (N=C), 1163.83 (C-S)  $\text{cm}^{-1}$ .  **$^1\text{H}$  NMR** (300 MHz,  $\text{CDCl}_3$ )  $\delta$  7.99 – 7.89 (m, 2H), 7.51 (t,  $J = 7.7$  Hz, 1H), 7.37 (dt,  $J = 7.8, 1.3$  Hz, 1H), 7.30 – 7.15 (m, 4H), 7.08 (s, 1H), 4.37 (q,  $J = 7.1$  Hz, 2H), 2.78 (q,  $J = 7.6$  Hz, 2H,  $\text{CH}_2$ ), 2.40 (s, 3H,  $\text{CH}_3$ ), 1.36 (dt,  $J = 20.6, 7.4$  Hz, 6H,  $(\text{CH}_3)_2$ ).  **$^{13}\text{C}$  NMR** (75 MHz,  $\text{CDCl}_3$ )  $\delta$  176.8(C=O), 165.7(C=O), 165.1(C=O), 165.1, 145.5, 144.5, 140.8, 134.0, 132.1, 130.4, 129.1, 129.1, 129.0, 127.1, 124.8, 120.8, 120.3, 77.2, 62.0, 52.8( $\text{CH}_2$ ), 28.7( $\text{CH}_2$ ), 21.8( $\text{CH}_3$ ), 15.4( $\text{CH}_3$ ), 14.2( $\text{CH}_3$ ). Anal. calcd. For  $\text{C}_{23}\text{H}_{22}\text{N}_2\text{O}_4\text{S}$  (422.13): C, 65.39, H, 5.25, N, 6.63, O, 15.15, S, 7.59. Found: C, 65.37, H, 5.22, N, 6.60, S, 7.57. GC-MS ( $\text{ESI}^-$ )  $m/z = 422.0$ .

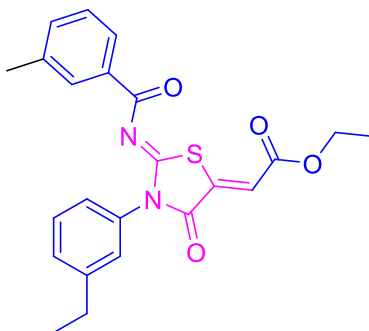

***Ethyl(Z)-2-((Z)-3-(3-ethylphenyl)-2-((3-methylbenzoyl)imino)-4-oxothiazolidin-5-ylidene)acetate (6e)***

White solid Yield: 79%;  $R_f$ : 0.59; m.p. 235-237°C; **FTIR**: 2961.35 (C-H aliphatic, asymmetric,  $\text{sp}^3$ ), 2925.447 (C-H aliphatic, symmetric,  $\text{sp}^3$ ), 1734.11, 1695.79, 1644.37 (3C=O), 1523.49 (N=C), 1159.61 (C-S)  $\text{cm}^{-1}$ .  **$^1\text{H}$  NMR** (300 MHz,  $\text{CDCl}_3$ )  $\delta$  7.92 – 7.79 (m, 2H), 7.51 (t,  $J = 7.7$  Hz, 1H), 7.43 – 7.19 (m, 5H), 7.09 (s, 1H), 4.38 (q,  $J = 7.1$  Hz, 2H,  $\text{CH}_2$ ), 2.78 (q,  $J = 7.6$  Hz, 2H,  $\text{CH}_2$ ), 2.36 (s, 3H,  $\text{CH}_3$ ), 1.37 (dt,  $J = 20.2, 7.4$  Hz, 6H,  $(\text{CH}_3)_2$ ).  **$^{13}\text{C}$  NMR** (75 MHz,  $\text{CDCl}_3$ )  $\delta$  177.1(C=O), 165.9(C=O), 165.1(C=O), 165.1, 145.5, 140.7, 138.1, 134.6, 134.4, 133.9, 130.8, 129.1, 129.0, 128.3, 127.6, 127.1, 124.8, 120.9, 62.0( $\text{CH}_2$ ), 28.7( $\text{CH}_2$ ), 21.3( $\text{CH}_3$ ), 15.4( $\text{CH}_3$ ),

14.2(CH<sub>3</sub>). Anal. calcd. For C<sub>23</sub>H<sub>22</sub>N<sub>2</sub>O<sub>4</sub>S (422.13): C, 65.39, H, 5.25, N, 6.63, O, 15.15, S, 7.59. Found: C, 65.37, H, 5.22, N, 6.60, S, 7.57. GC-MS (ESI<sup>-</sup>) m/z = 422.0.

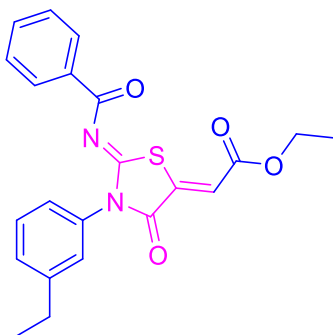

***Ethyl(Z)-2-((Z)-2-((3-benzoyl)imino)-3-(3-ethylphenyl)-4-oxothiazolidin-5-ylidene)acetate (6f)***

White solid Yield: 81%; R<sub>f</sub>: 0.61: m.p. 235-237°C; **FTIR**: 2960.56 (C-H aliphatic stretch), 1737.20, 1697.48, 1637.27 (3C=O), 1513.26 (N=C), 1186.30 (C-S) cm<sup>-1</sup>. **<sup>1</sup>H NMR** (300 MHz, CDCl<sub>3</sub>) δ 7.49 (td, *J* = 9.3, 4.7 Hz, 2H), 7.37 (s, 1H), 7.31 – 7.05 (m, 5H), 4.37 (q, *J* = 7.1 Hz, 2H), 2.76 (q, *J* = 7.6 Hz, 2H), 1.35 (dt, *J* = 24.6, 7.4 Hz, 6H). Anal. calcd. For C<sub>22</sub>H<sub>20</sub>N<sub>2</sub>O<sub>4</sub>S (408.1144): C, 64.69, H, 4.94, N, 6.86, O, 15.67, S, 7.85. Found: C, 64.67, H, 4.92, N, 6.83, S, 7.84. GC-MS (ESI<sup>-</sup>) m/z = 408.0.

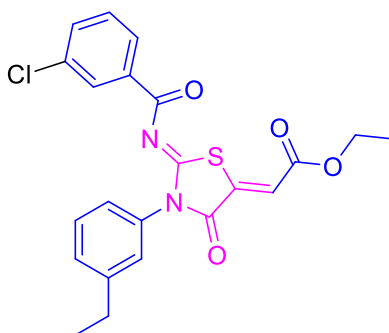

***Ethyl(Z)-2-((Z)-2-((3-chlorobenzoyl)imino)-3-(3-ethylphenyl)-4-oxothiazolidin-5-ylidene)acetate (6g)***

White solid Yield: 86%; R<sub>f</sub>: 0.52: m.p. 235-237°C; **FTIR**: 2960.56 (C-H aliphatic stretch), 1737.20, 1697.48, 1637.27 (3C=O), 1513.26 (N=C), 1186.30 (C-S) cm<sup>-1</sup>. **<sup>1</sup>H NMR** (300 MHz, CDCl<sub>3</sub>) δ 8.04 – 7.87 (m, 1H), 7.51 (t, *J* = 7.8 Hz, 1H), 7.43 – 7.18 (m, 2H), 4.38 (q, *J* = 7.1 Hz, 1H, CH<sub>2</sub>), 2.79 (q, *J* = 7.6 Hz, 1H, CH<sub>2</sub>), 1.37 (dt, *J* = 18.5, 7.4 Hz, 3H, (CH<sub>3</sub>)<sub>2</sub>). **<sup>13</sup>C NMR** (75 MHz, CDCl<sub>3</sub>) δ 175.7(C=O), 167.4(C=O), 165.0(C=O), 164.9, 145.7, 140.3, 136.5, 134.5, 133.8,

133.4, 130.3, 129.7, 129.1, 129.1, 128.3, 127.0, 124.7, 121.4, 62.1(CH<sub>2</sub>), 28.7(CH<sub>2</sub>), 15.4(CH<sub>3</sub>), 14.2(CH<sub>3</sub>). Anal. calcd. For C<sub>22</sub>H<sub>19</sub>ClN<sub>2</sub>O<sub>4</sub>S (442.0754): C, 59.66, H, 4.32, Cl, 8.00, N, 6.32, O, 14.45, S, 7.24. Found: C, 59.62, H, 4.30, N, 6.29, S, 7.21. GC-MS (ESI<sup>-</sup>) m/z = 442.0.

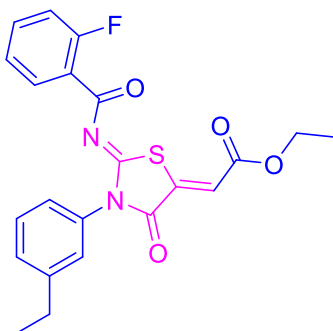

***Ethyl(Z)-2-((Z)-3-(3-ethylphenyl)-2-((2-fluorobenzoyl)imino)-4-oxothiazolidin-5-ylidene)acetate (6h)***

White solid Yield: 78%; R<sub>f</sub> 0.50: m.p. 235-237°C; **FTIR**: 2970.41 (C-H aliphatic stretch), 1731.79, 1692.17, 1651.13 (3C=O), 1530.36 (N=C), 1192.24 (C-S) cm<sup>-1</sup>. **<sup>1</sup>H NMR** (300 MHz, CDCl<sub>3</sub>) δ 7.91 (td, *J* = 8.0, 2.0 Hz, 1H), 7.49 (td, *J* = 9.3, 4.7 Hz, 2H), 7.37 (s, 1H), 7.31 – 7.05 (m, 5H), 4.37 (q, *J* = 7.1 Hz, 2H, CH<sub>2</sub>), 2.76 (q, *J* = 7.6 Hz, 2H, CH<sub>2</sub>), 1.35 (dt, *J* = 24.6, 7.4 Hz, 5H, (CH<sub>3</sub>)<sub>2</sub>). **<sup>13</sup>C NMR** (75 MHz, CDCl<sub>3</sub>) δ 174.6(C=O), 174.6(C=O), 165.9(C=O), 165.0, 164.9, 164.5, 161.0, 145.6, 140.4, 135.1, 135.0, 133.8, 132.9, 129.1, 129.0, 127.1, 124.8, 123.8, 123.8, 123.0, 122.9, 121.2, 117.2, 116.9, 77.2, 62.0(CH<sub>2</sub>), 28.6(CH<sub>2</sub>), 15.3(CH<sub>3</sub>), 14.2(CH<sub>3</sub>). Anal. calcd. For C<sub>22</sub>H<sub>19</sub>FN<sub>2</sub>O<sub>4</sub>S (426.1050): C, 61.96, H, 4.49, F, 4.45, N, 6.57, O, 15.01, S, 7.52. Found: C, 61.94, H, 4.46, N, 6.55, S, 7.50. GC-MS (ESI<sup>-</sup>) m/z = 426.0.

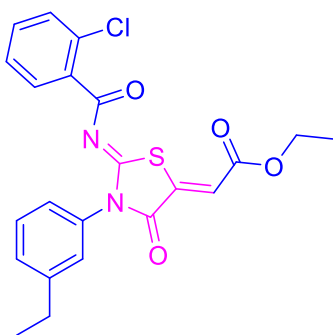

***Ethyl(Z)-2-((Z)-2-((2-chlorobenzoyl)imino)-3-(3-ethylphenyl)-4-oxothiazolidin-5-ylidene)acetate (6i)***

White solid Yield: 80%;  $R_f$ : 0.54; m.p. 235-237°C; **FTIR**: 2971.41 (C-H aliphatic stretch), 1731.31, 1693, 1650.20 (3C=O), 1524.38 (N=C), 1187.81 (C-S)  $\text{cm}^{-1}$ .  **$^1\text{H}$  NMR** (300 MHz,  $\text{CDCl}_3$ )  $\delta$  7.94 – 7.85 (m, 1H), 7.53 – 7.15 (m, 7H), 4.38 (q,  $J$  = 7.1 Hz, 2H,  $\text{CH}_2$ ), 2.75 (q,  $J$  = 7.6 Hz, 2H,  $\text{CH}_2$ ), 1.39 (t,  $J$  = 7.1 Hz, 3H,  $\text{CH}_3$ ), 1.30 (t,  $J$  = 7.6 Hz, 3H,  $\text{CH}_3$ ).  **$^{13}\text{C}$  NMR** (75 MHz,  $\text{CDCl}_3$ )  $\delta$  176.2(C=O), 166.5(C=O), 165.0(C=O), 165.0, 145.6, 140.3, 134.7, 133.8, 133.3, 133.1, 132.9, 131.4, 129.1, 129.1, 127.1, 126.4, 124.8, 121.3, 62.1( $\text{CH}_2$ ), 28.6( $\text{CH}_2$ ), 15.3( $\text{CH}_3$ ), 14.2( $\text{CH}_3$ ). Anal. calcd. For  $\text{C}_{22}\text{H}_{19}\text{ClN}_2\text{O}_4\text{S}$  (442.0754): C, 59.66, H, 4.32, Cl, 8.00, N, 6.32, O, 14.45, S, 7.24. Found: C, 59.62, H, 4.30, N, 6.29, S, 7.21. GC-MS ( $\text{ESI}^-$ )  $m/z$  = 442.0.

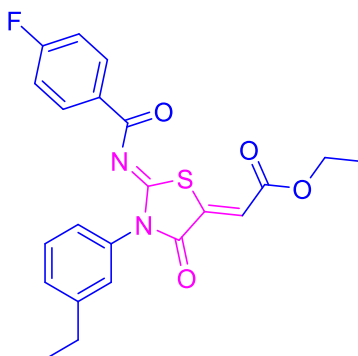

***Ethyl(Z)-2-((Z)-3-(3-ethylphenyl)-2-((4-fluorobenzoyl)imino)-4-oxothiazolidin-5-ylidene)acetate (6j)***

White solid Yield: 85%;  $R_f$ : 0.47; m.p. 235-237°C; **FTIR**: 2966.32 (C-H aliphatic stretch), 1731.46, 1699.03, 1644.40 (3C=O), 1527.99 (N=C), 1186.45 (C-S)  $\text{cm}^{-1}$ .  **$^1\text{H}$  NMR** (300 MHz,  $\text{CDCl}_3$ )  $\delta$  8.12 – 8.00 (m, 2H), 7.51 (t,  $J$  = 7.7 Hz, 1H), 7.33 – 7.17 (m, 2H), 7.13 – 6.99 (m, 3H), 4.38 (q,  $J$  = 7.1 Hz, 2H,  $\text{CH}_2$ ), 2.78 (q,  $J$  = 7.6 Hz, 2H,  $\text{CH}_2$ ), 1.36 (dt,  $J$  = 22.8, 7.4 Hz, 6H, ( $\text{CH}_3$ )<sub>2</sub>).  **$^{13}\text{C}$  NMR** (75 MHz,  $\text{CDCl}_3$ )  $\delta$  175.7(C=O), 167.8(C=O), 166.7(C=O), 165.1, 165.0, 164.4, 145.6, 140.5, 133.9, 133.0, 132.9, 131.1, 131.1, 129.1, 129.1, 127.0, 124.8, 121.2, 115.6, 115.3, 62.0( $\text{CH}_2$ ), 28.7( $\text{CH}_2$ ), 15.4( $\text{CH}_3$ ), 14.2( $\text{CH}_3$ ). Anal. calcd. For  $\text{C}_{22}\text{H}_{19}\text{FN}_2\text{O}_4\text{S}$  (426.1050): C, 61.96, H, 4.49, F, 4.45, N, 6.57, O, 15.01, S, 7.52. Found: C, 61.94, H, 4.46, N, 6.55, S, 7.50. GC-MS ( $\text{ESI}^-$ )  $m/z$  = 426.0.

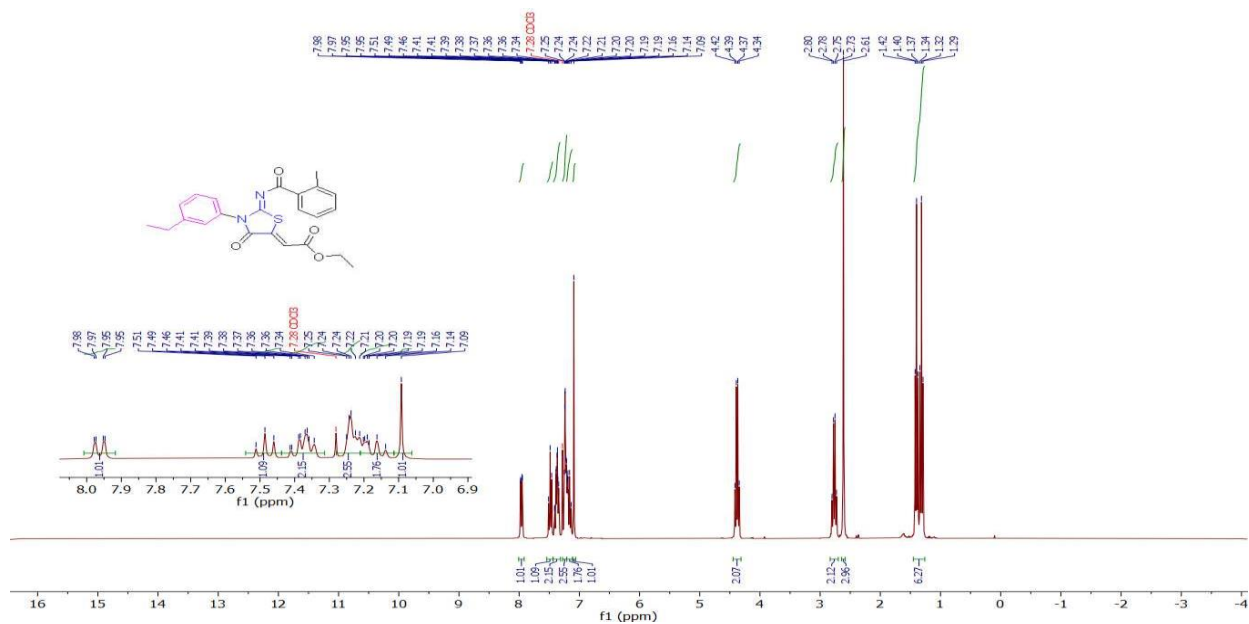

**Figure S1** <sup>1</sup>H NMR of Ethyl(Z)-2-((Z)-3-(3-ethylphenyl)-2-((2-methylbenzoyl)imino)-4-oxothiazolidin-5-ylidene)acetate (6a)

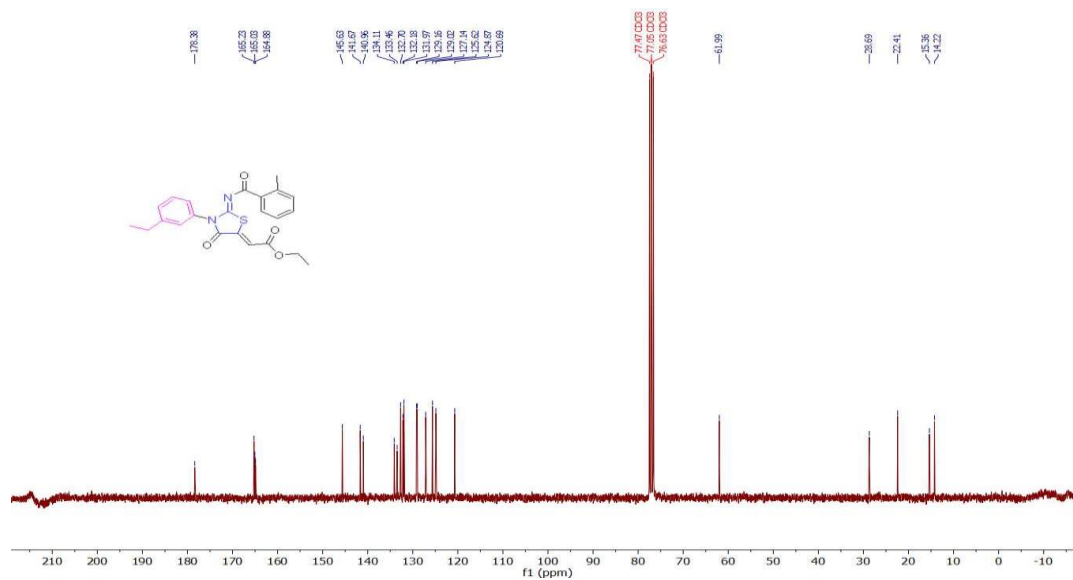

**Figure S2** <sup>13</sup>C NMR Ethyl(Z)-2-((Z)-3-(3-ethylphenyl)-2-((2-methylbenzoyl)imino)-4-oxothiazolidin-5-ylidene)acetate (6a)



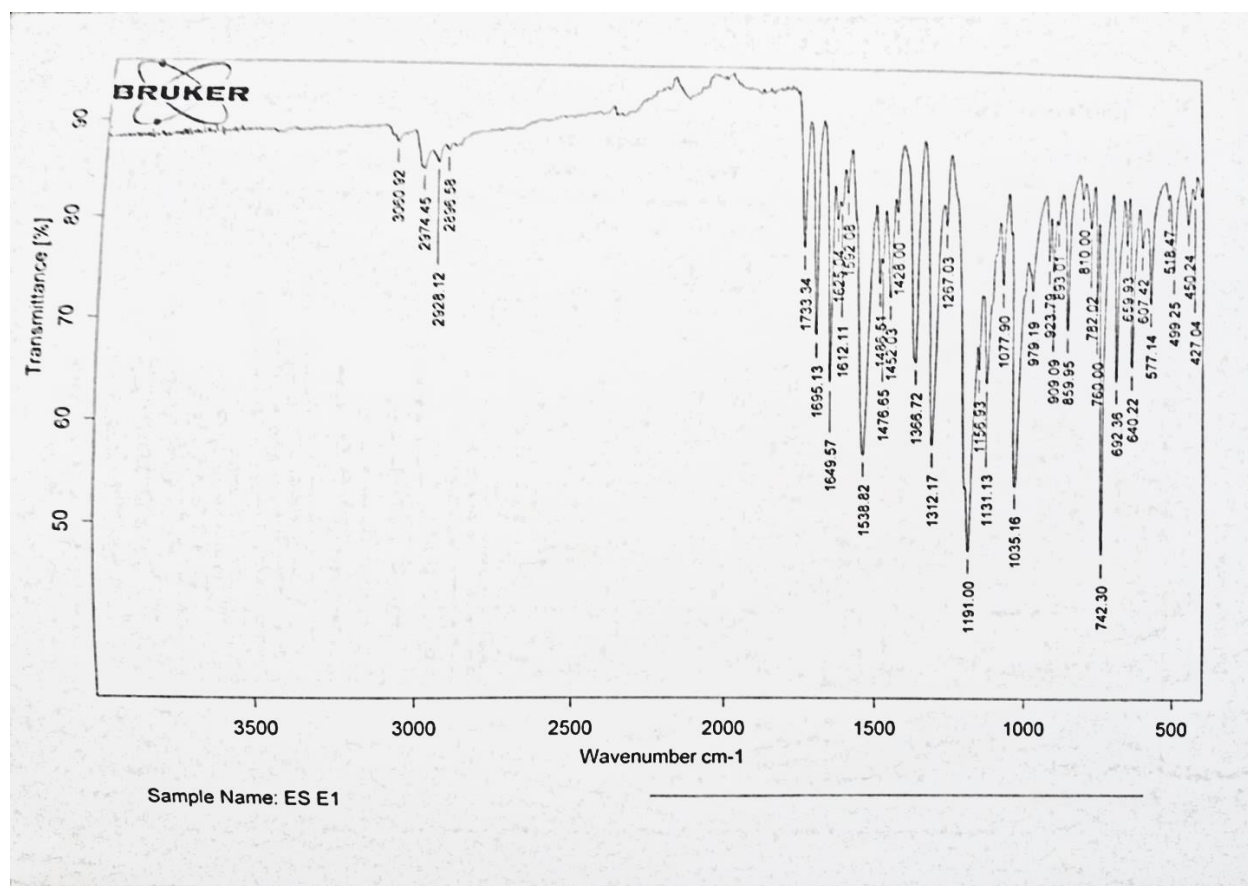

**Figure S3** IR spectra of Ethyl(Z)-2-((Z)-3-(3-ethylphenyl)-2-((2-methylbenzoyl)imino)-4-oxothiazolidin-5-ylidene)acetate (6a)

file : C:\MSDCHEM\1\DATA\2019\Dr. Amor Saeed\Attique Ahmed\ESE-1 20  
 -06-19.D  
 Operator : Saqib Yasin  
 Instrument : Instrument #1  
 Acquired : 20 Jun 2019 12:08 using AcqMethod LIQUID.M  
 Sample Name : ESE-1  
 GC Info : Temp 120-280 10 C/min flow 1.5ml/min inj 5ul

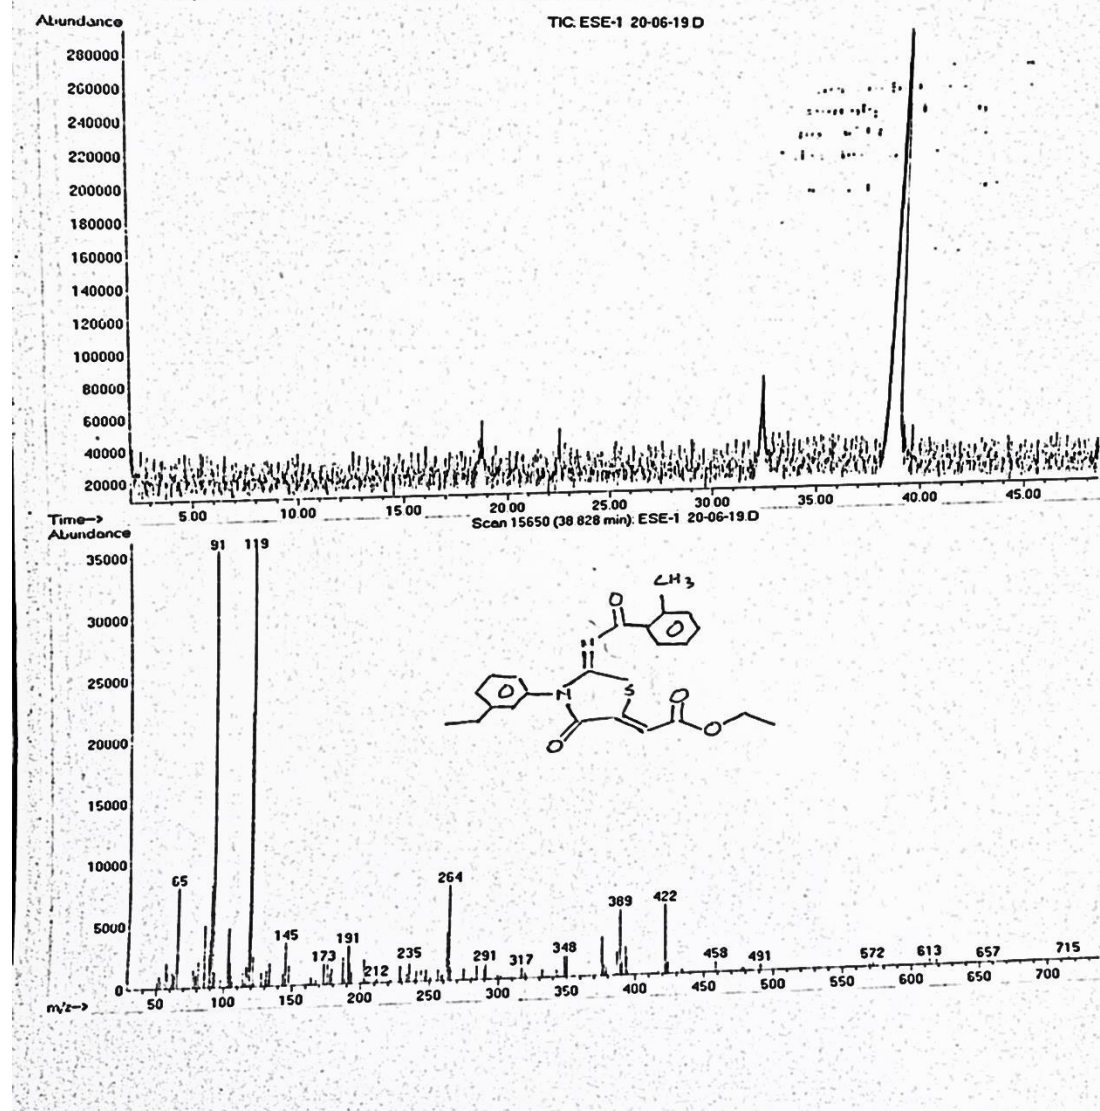

Figure S4 MS spectra of Ethyl(Z)-2-((Z)-3-(3-ethylphenyl)-2-((2-methylbenzoyl)imino)-4-oxothiazolidin-5-ylidene)acetate (6a)

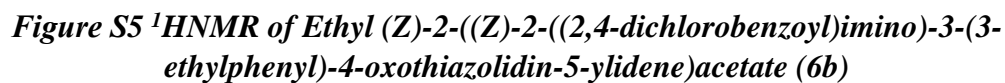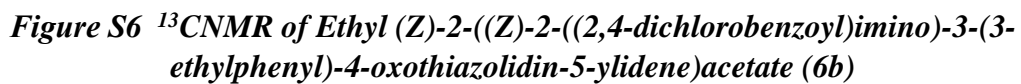

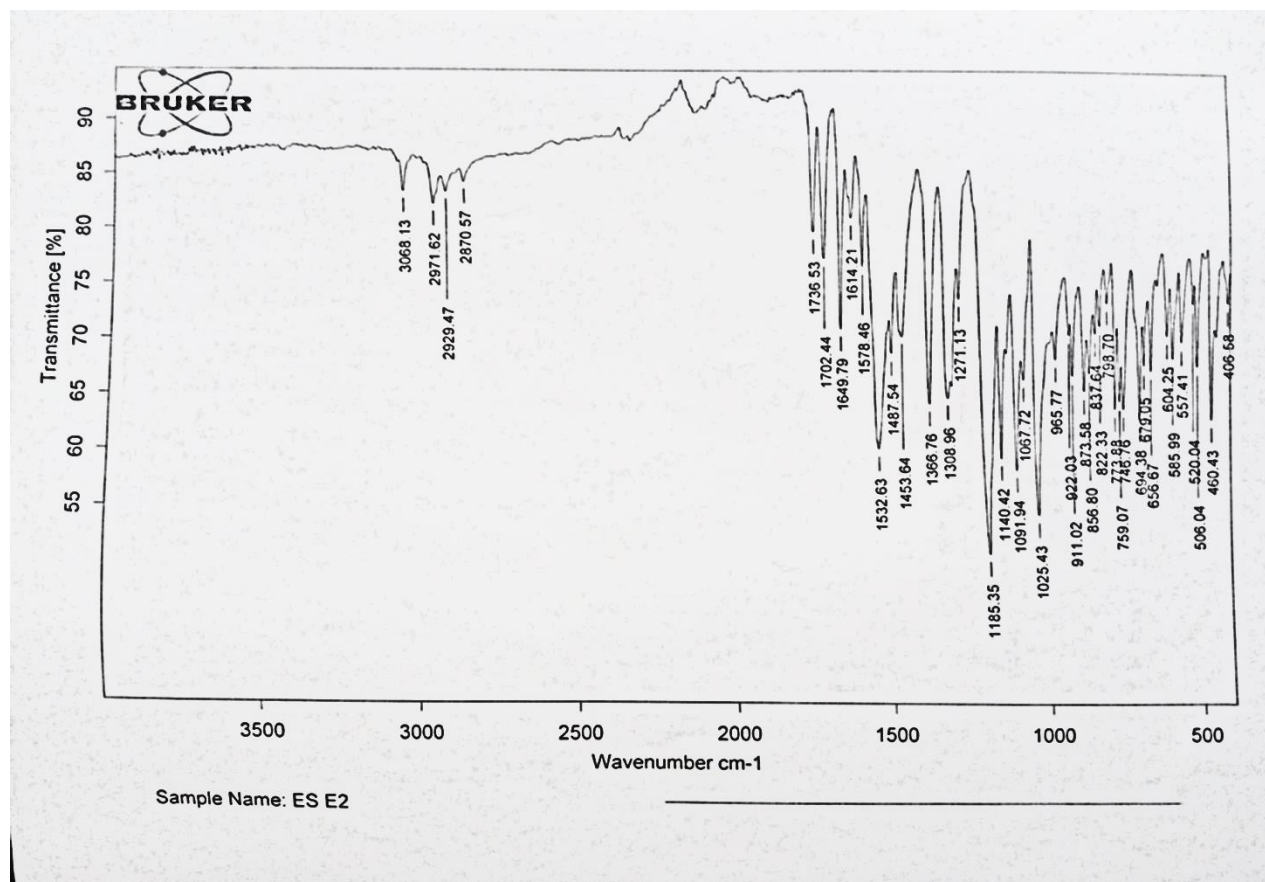

**Figure S7** IR spectra of Ethyl (Z)-2-((Z)-2-((2,4-dichlorobenzoyl)imino)-3-(3-ethylphenyl)-4-oxothiazolidin-5-ylidene)acetate (**6b**)



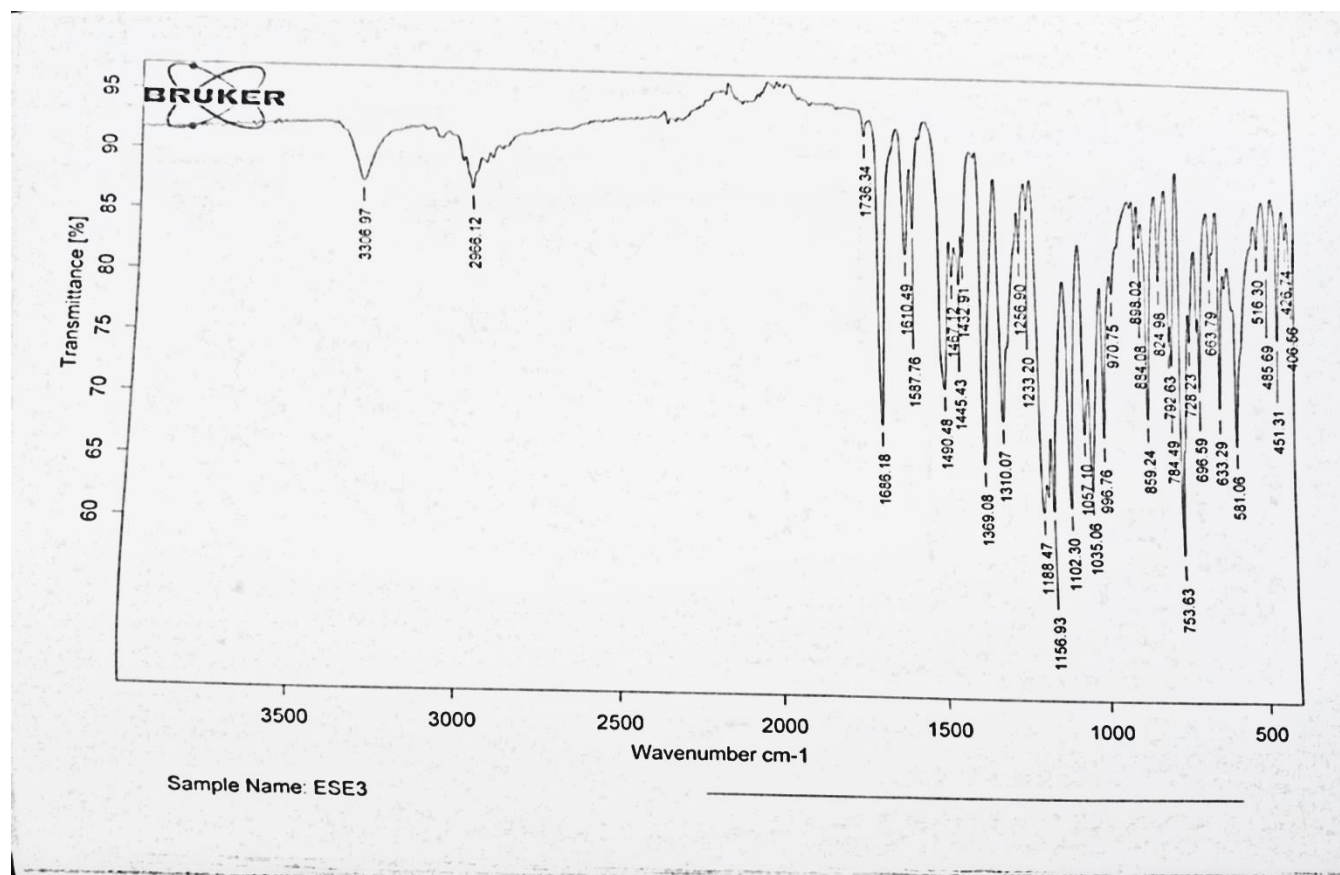

**Figure S10** IR spectra of Ethyl (Z)-2-((Z)-2-((3-bromobenzoyl)imino)-3-(3-ethylphenyl)-4-oxothiazolidin-5-ylidene)acetate (6c)



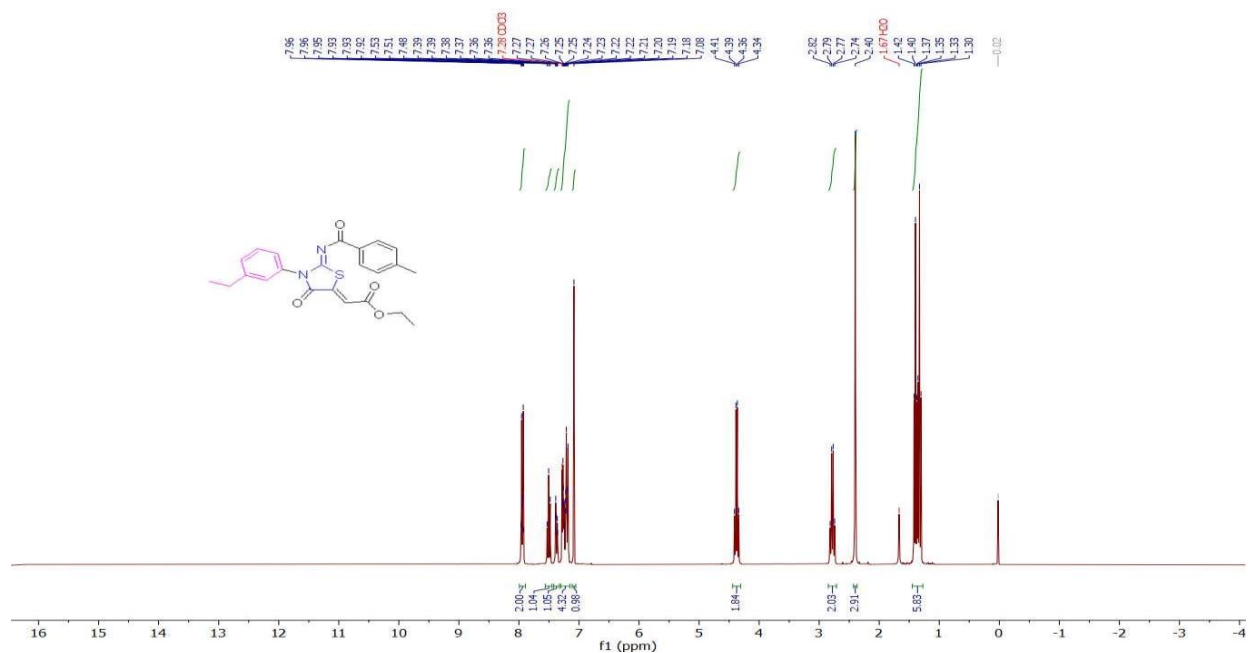

**Figure S11**  $^1\text{H}$ NMR of Ethyl (Z)-2-((Z)-3-(3-ethylphenyl)-2-((4-methylbenzoyl)imino)-4-oxothiazolidin-5-ylidene)acetate (6d)

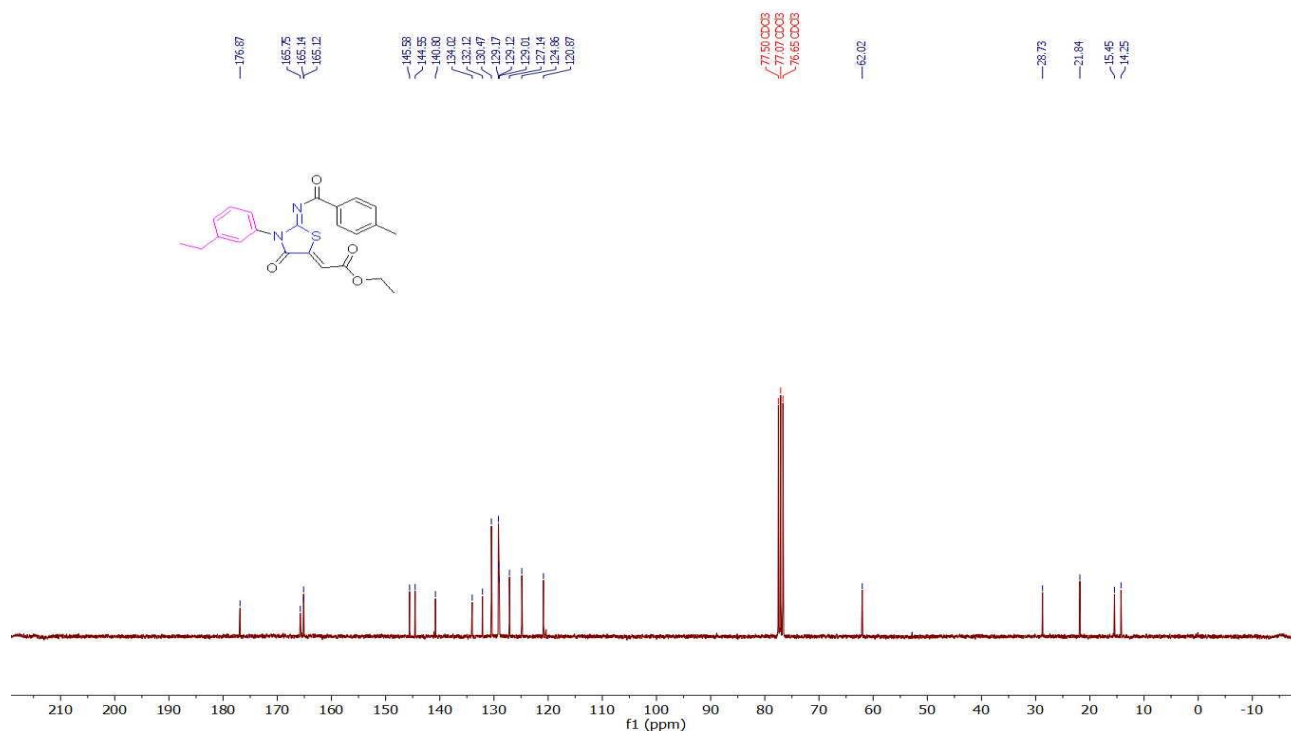

**Figure S12**  $^{13}\text{C}$ NMR of Ethyl (Z)-2-((Z)-3-(3-ethylphenyl)-2-((4-methylbenzoyl)imino)-4-oxothiazolidin-5-ylidene)acetate (6d)

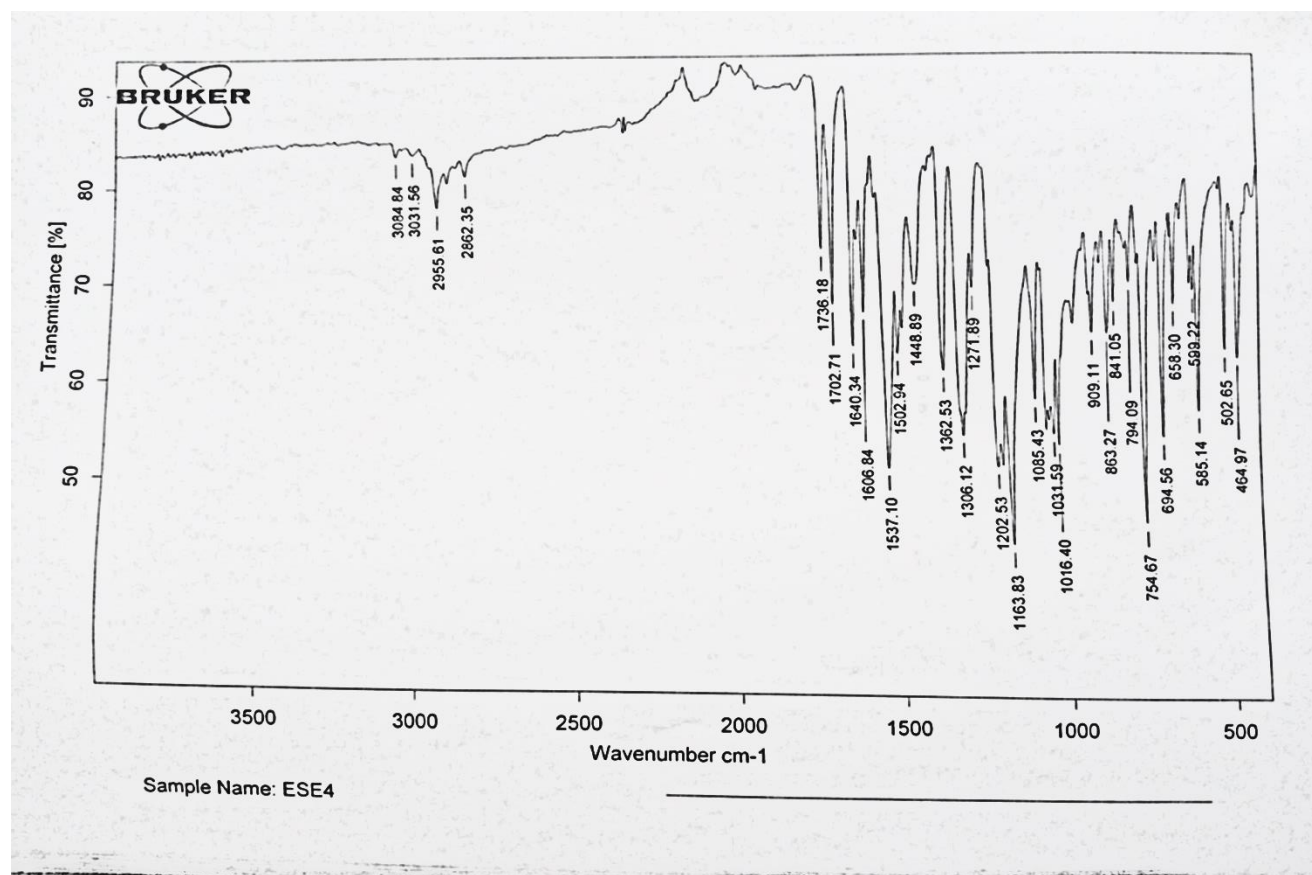

**Figure S13** IR spectra of Ethyl (Z)-2-((Z)-3-(3-ethylphenyl)-2-((4-methylbenzoyl)imino)-4-oxothiazolidin-5-ylidene)acetate(6d)



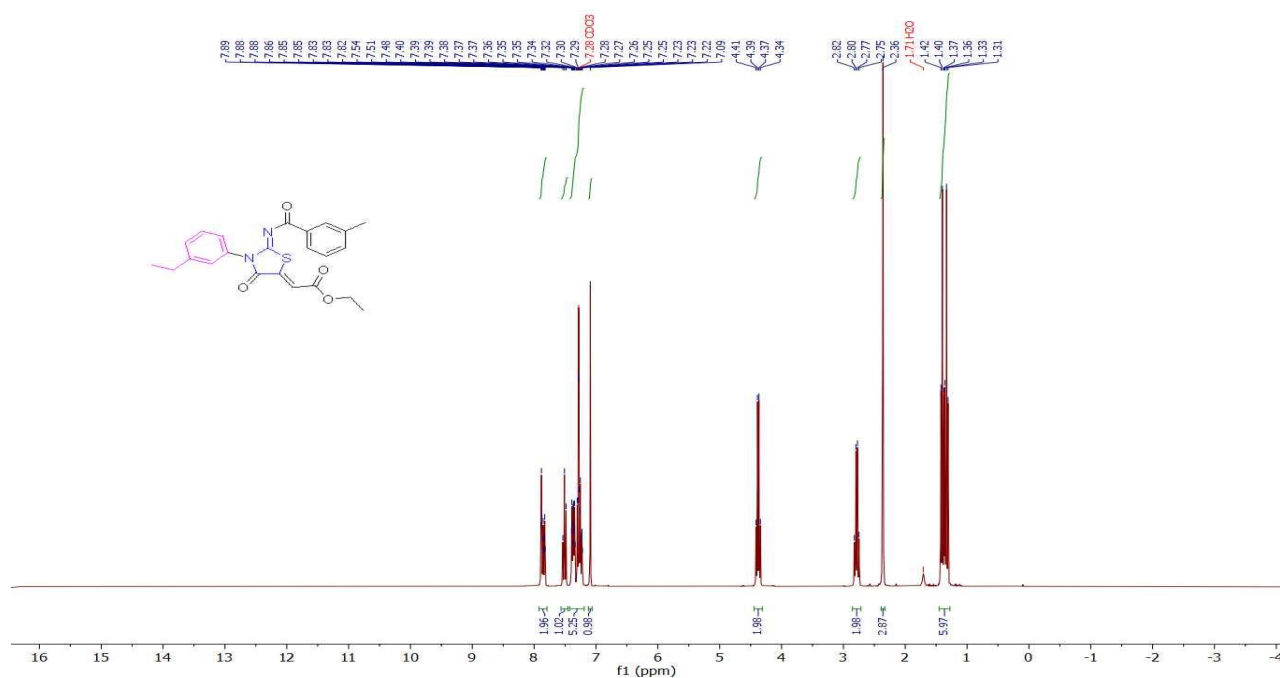

**Figure S14** <sup>1</sup>H NMR of Ethyl (Z)-2-((Z)-3-(3-ethylphenyl)-2-((3-methylbenzoyl)imino)-4-oxothiazolidin-5-ylidene)acetate (6e)

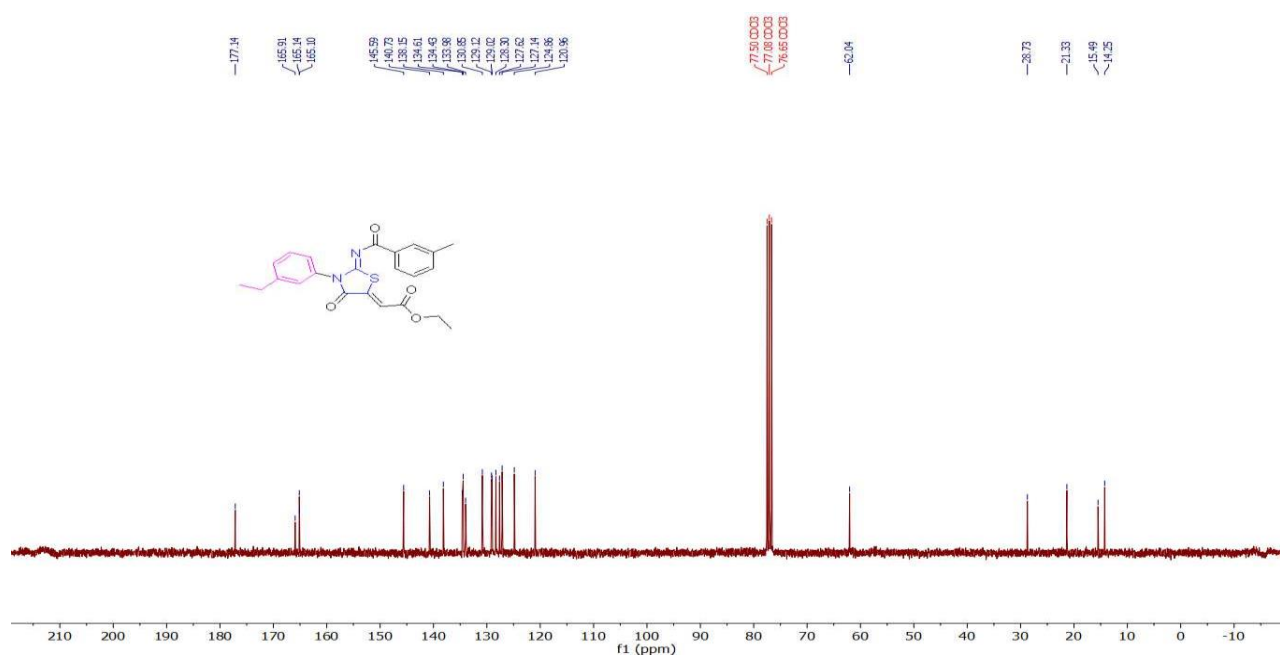

**Figure S15** <sup>13</sup>C NMR of Ethyl (Z)-2-((Z)-3-(3-ethylphenyl)-2-((3-methylbenzoyl)imino)-4-oxothiazolidin-5-ylidene)acetate (6e)

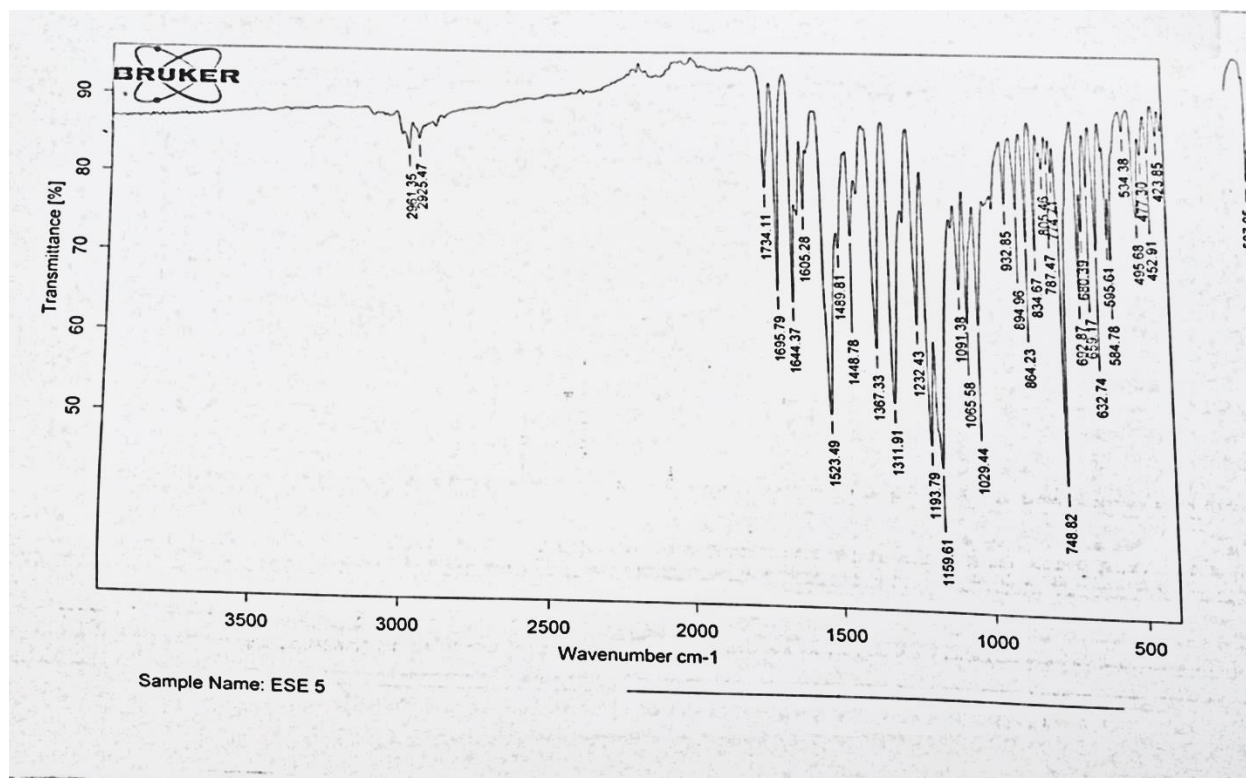

Figure S16 IR spectra of Ethyl (Z)-2-((Z)-3-(3-ethylphenyl)-2-((3-methylbenzoyl)imino)-4-oxothiazolidin-5-ylidene)acetate (6e)

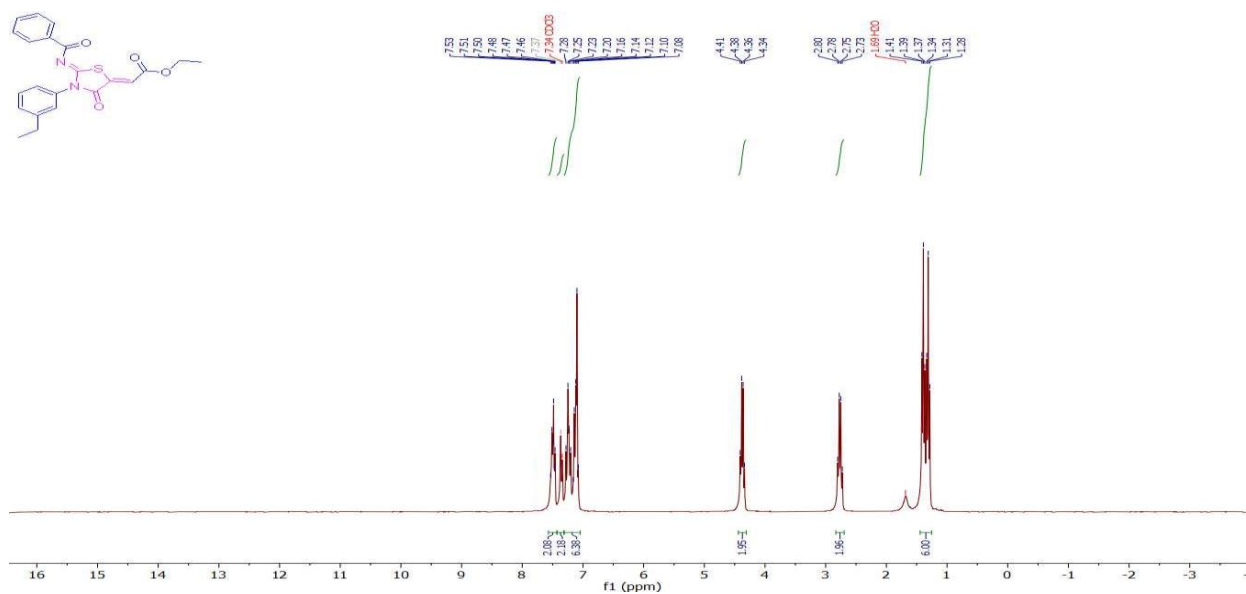

Figure S17 <sup>1</sup>H NMR of Ethyl (Z)-2-((Z)-2-(benzoylimino)-3-(3-ethylphenyl)-4-oxothiazolidin-5-ylidene)acetate (6f)

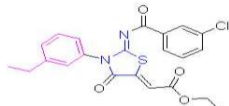

**Figure S18 <sup>1</sup>HNMR of Ethyl (Z)-2-((Z)-2-((3-chlorobenzoyl)imino)-3-(3-ethylphenyl)-4-oxothiazolidin-5-ylidene)acetate (6g)**

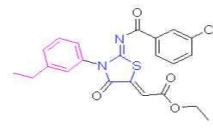

**Figure S19** <sup>13</sup>CNMR of Ethyl (Z)-2-((Z)-2-((3-chlorobenzoyl)imino)-3-(3-ethylphenyl)-4-oxothiazolidin-5-ylidene)acetate (6g)

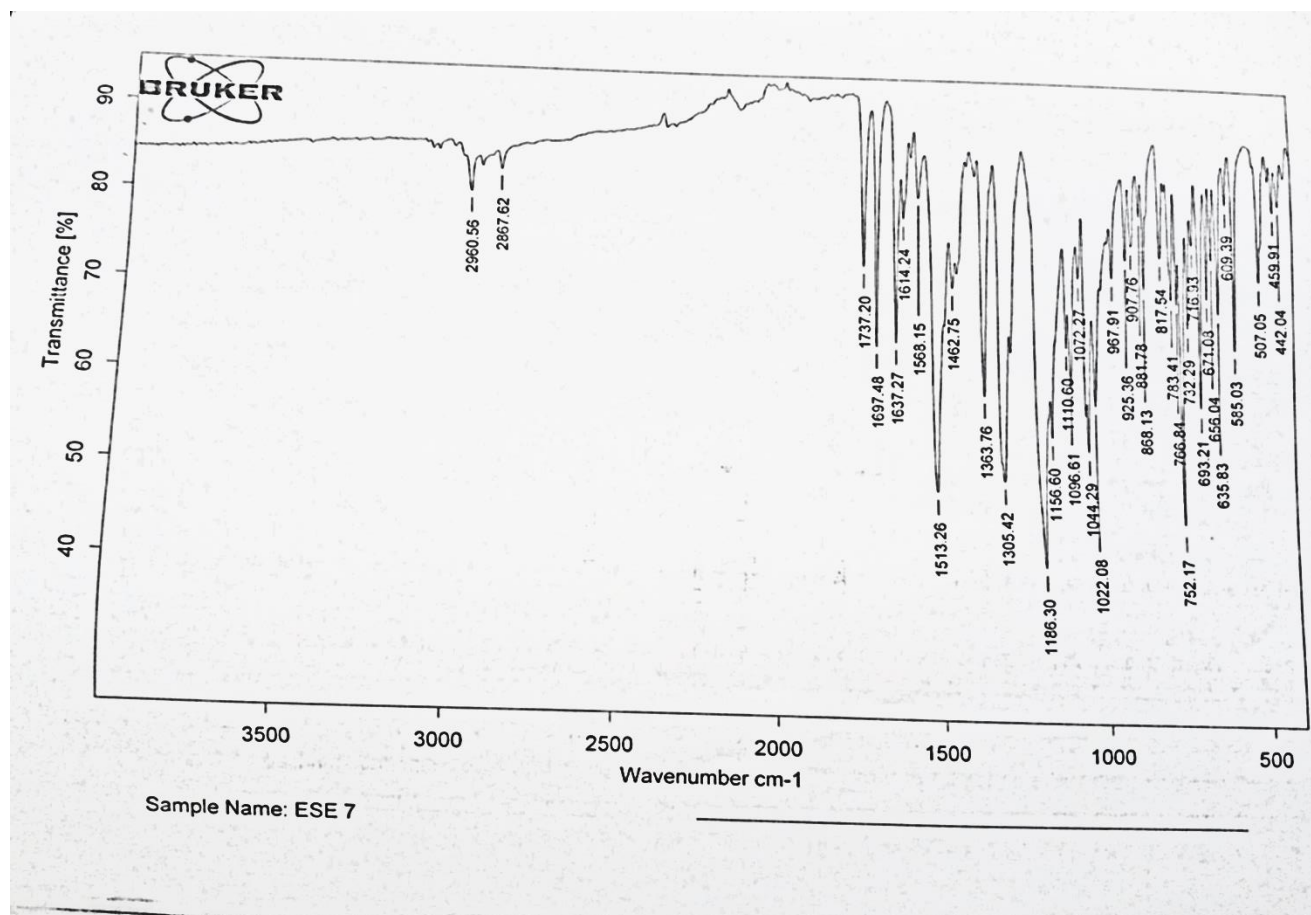

**Figure S20** IR spectra of Ethyl (Z)-2-((Z)-2-((3-chlorobenzoyl)imino)-3-(3-ethylphenyl)-4-oxothiazolidin-5-ylidene)acetate (6g)

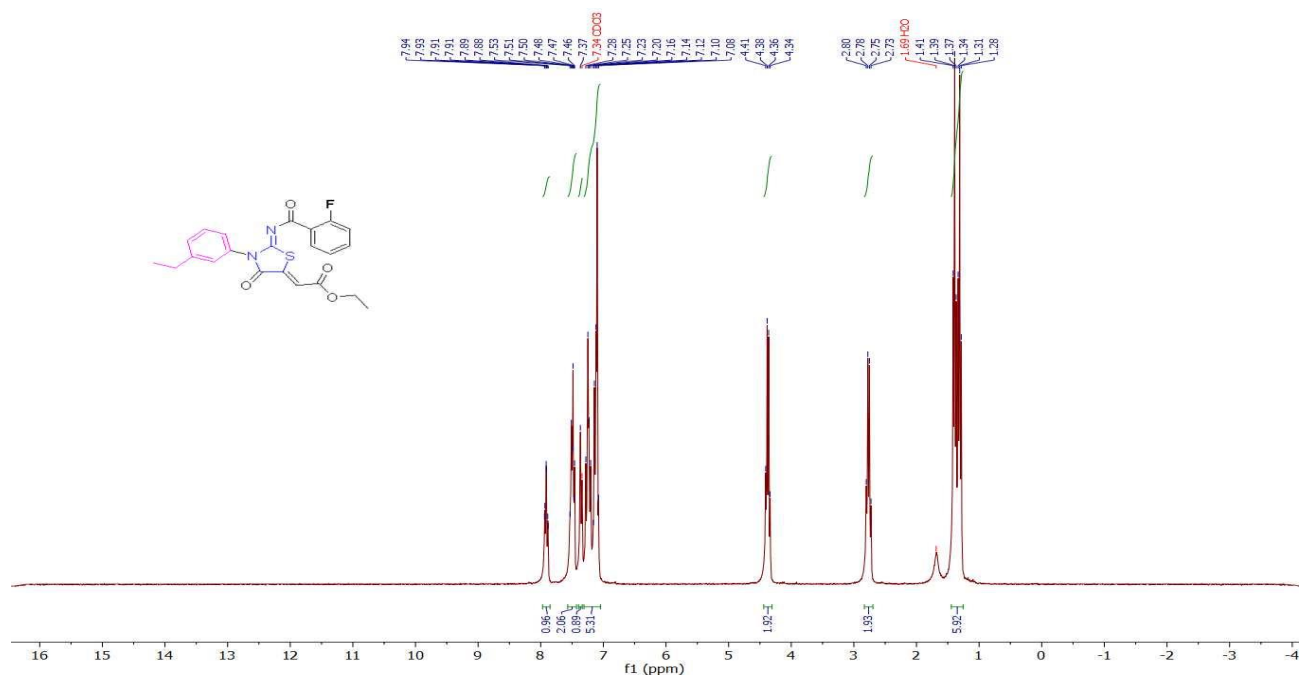

**Figure S21** <sup>1</sup>H NMR of Ethyl (Z)-2-((Z)-3-(3-ethylphenyl)-2-((2-fluorobenzoyl)imino)-4-oxothiazolidin-5-ylidene)acetate (6h)

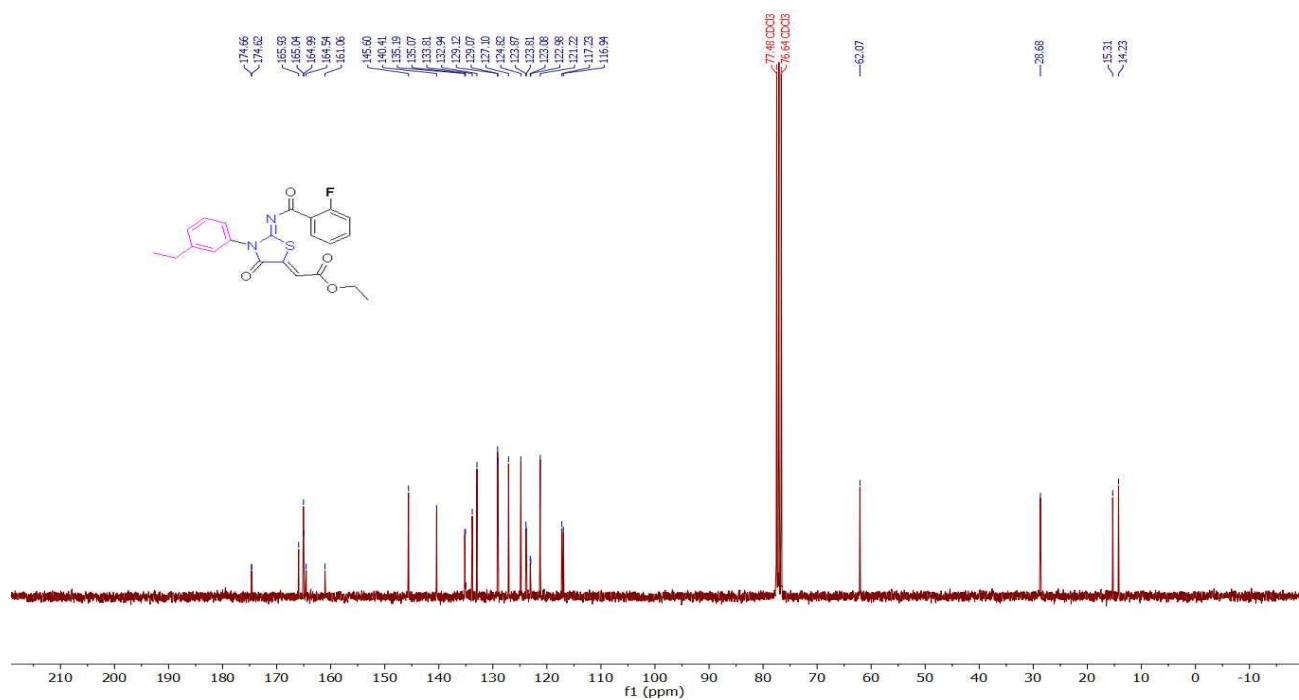

**Figure S22** <sup>13</sup>C NMR of Ethyl (Z)-2-((Z)-3-(3-ethylphenyl)-2-((2-fluorobenzoyl)imino)-4-oxothiazolidin-5-ylidene)acetate (6h)

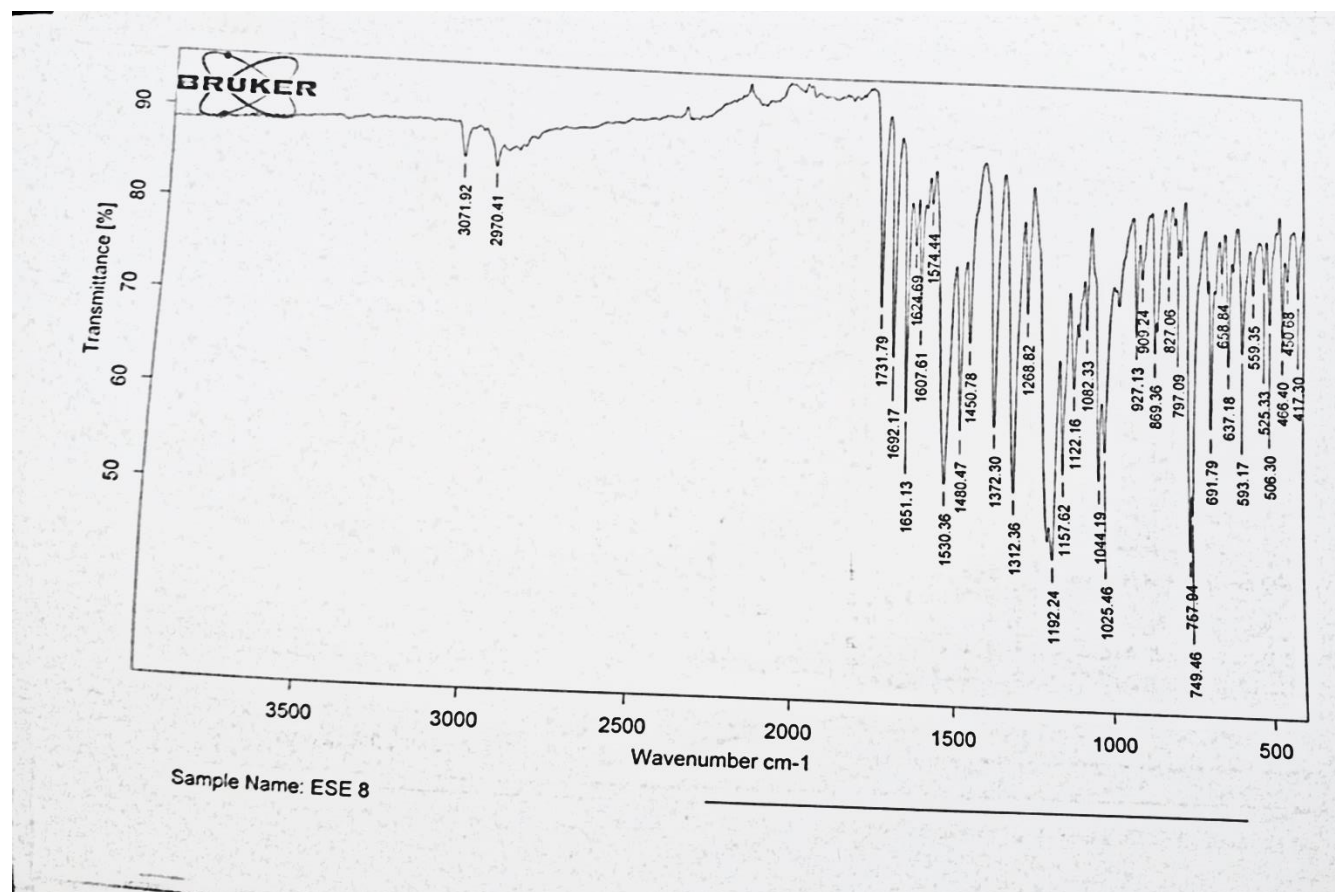

**Figure S23** IR spectra of *Ethyl (Z)-2-((Z)-3-(3-ethylphenyl)-2-((2-fluorobenzoyl)imino)-4-oxothiazolidin-5-ylidene)acetate (6h)*

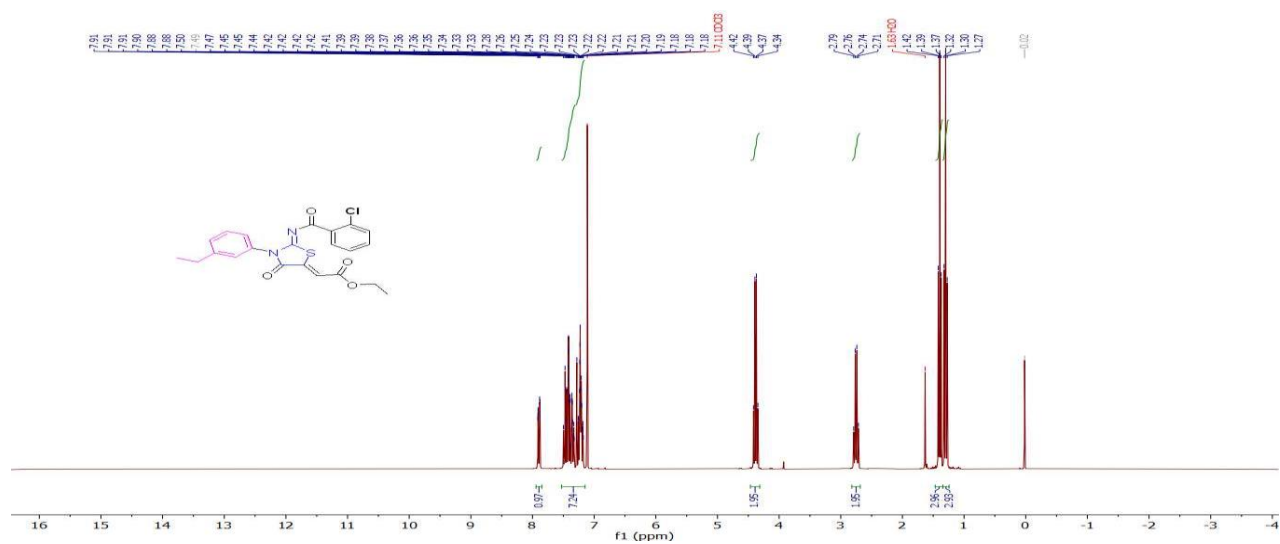

**Figure S24** <sup>1</sup>H NMR of Ethyl (Z)-2-((Z)-2-((2-chlorobenzoyl)imino)-3-(3-ethylphenyl)-4-oxothiazolidin-5-ylidene)acetate (6i)

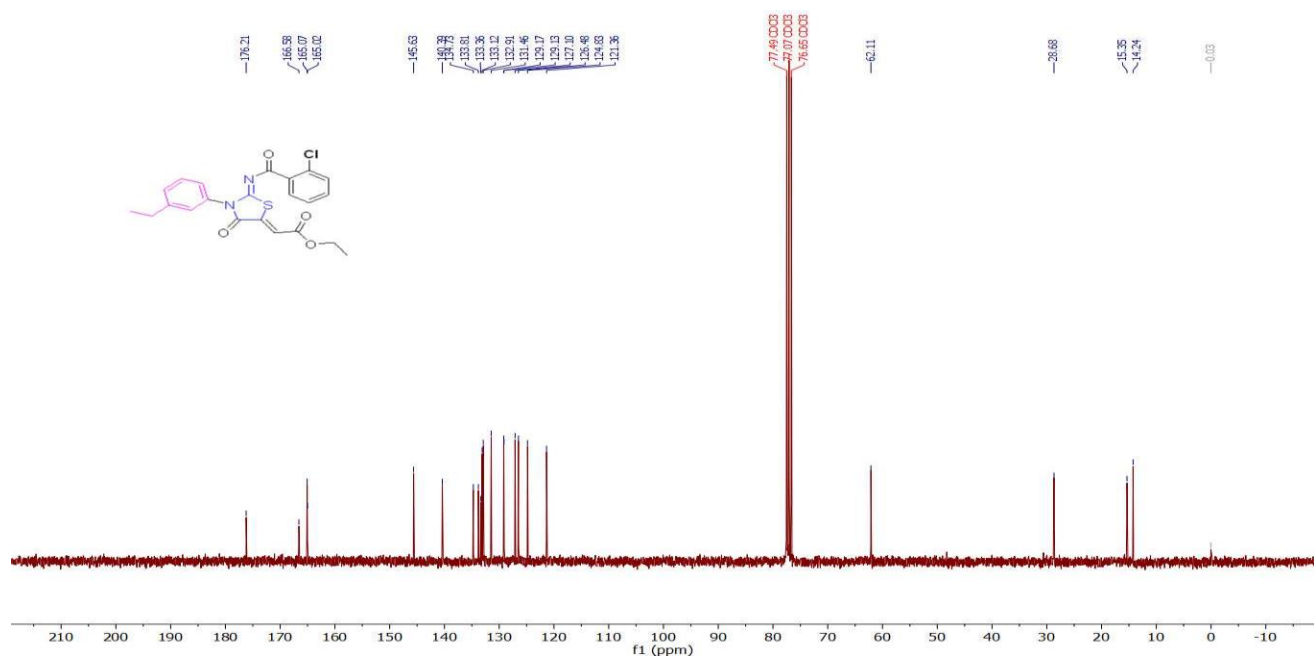

**Figure S25** <sup>13</sup>C NMR of Ethyl (Z)-2-((Z)-2-((2-chlorobenzoyl)imino)-3-(3-ethylphenyl)-4-oxothiazolidin-5-ylidene)acetate (6i)



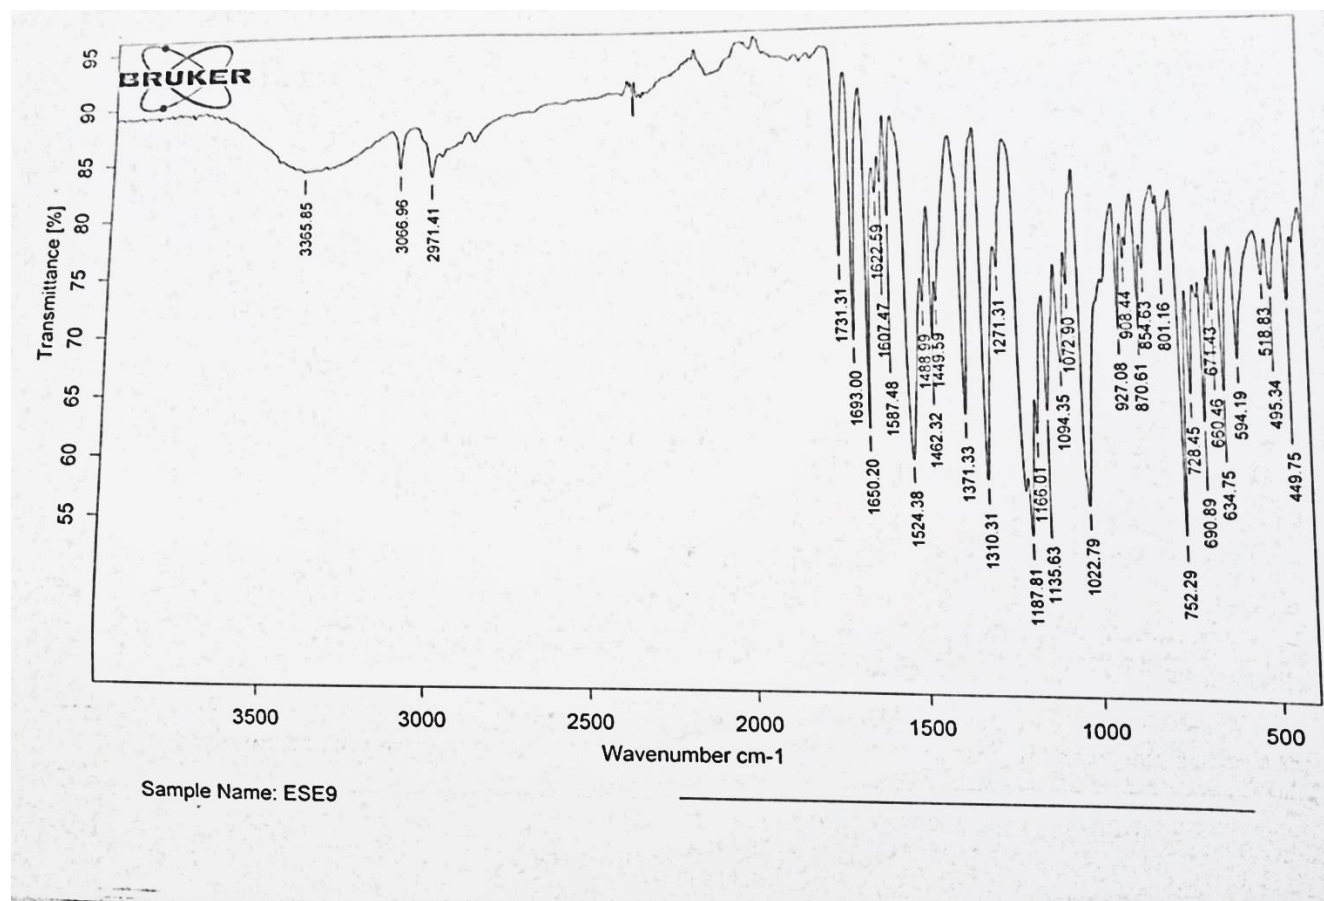

**Figure S26** IR spectra of *Ethyl (Z)-2-((Z)-2-((2-chlorobenzoyl)imino)-3-(3-ethylphenyl)-4-oxothiazolidin-5-ylidene)acetate (6i)*



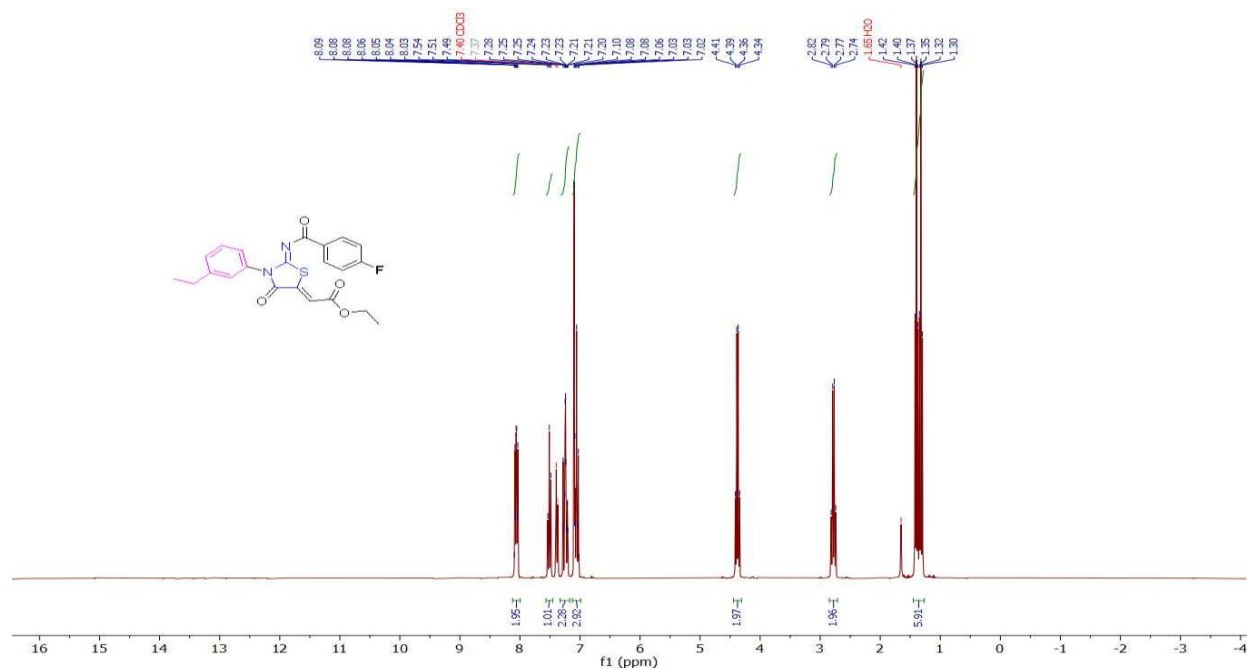

**Figure S27**  $^1\text{H}$ NMR of Ethyl (Z)-2-((Z)-3-(3-ethylphenyl)-2-((4-fluorobenzoyl)imino)-4-oxothiazolidin-5-ylidene)acetate (6j)

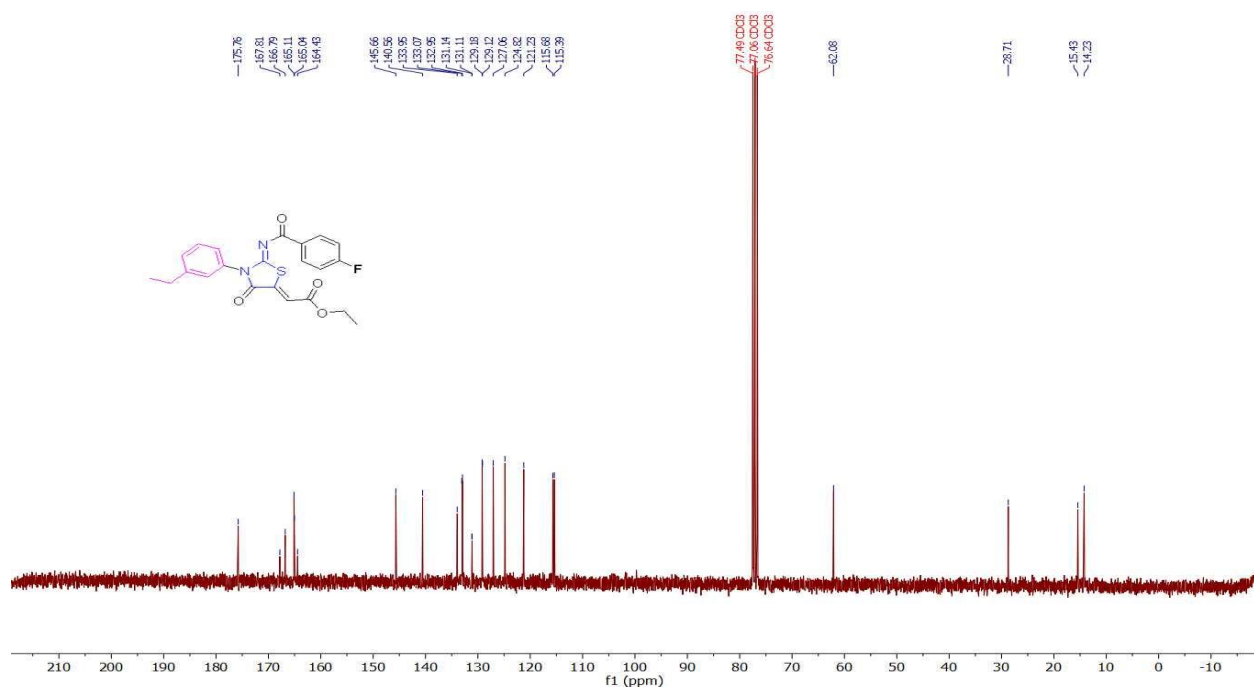

**Figure S28**  $^{13}\text{C}$ NMR of Ethyl (Z)-2-((Z)-3-(3-ethylphenyl)-2-((4-fluorobenzoyl)imino)-4-oxothiazolidin-5-ylidene)acetate (6j)

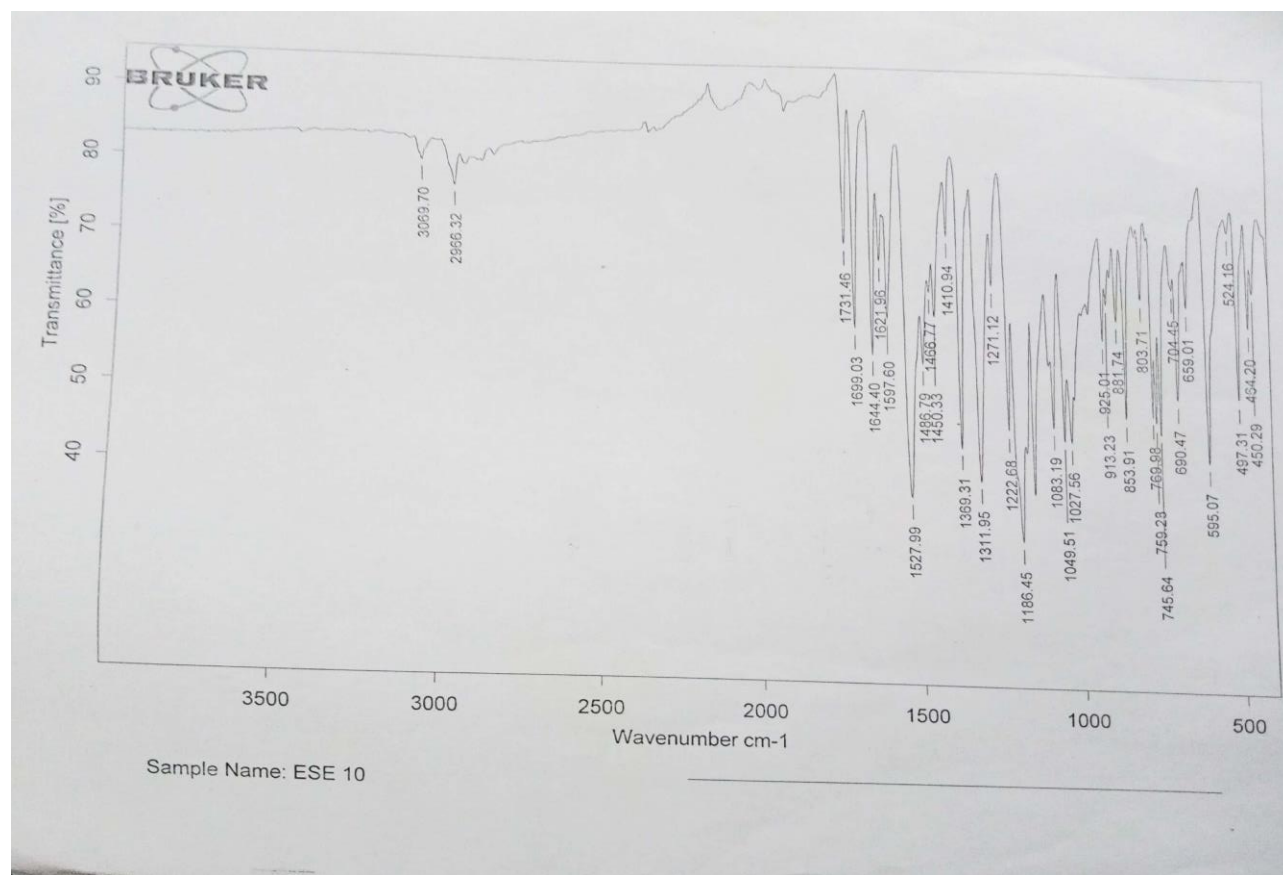

**Figure S29** IR spectra of *Ethyl (Z)-2-((Z)-3-(3-ethylphenyl)-2-((4-fluorobenzoyl)imino)-4-oxothiazolidin-5-ylidene)acetate (6j)*

Optimized structures

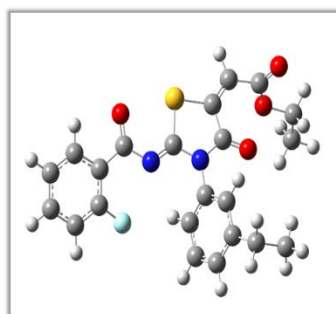

6b

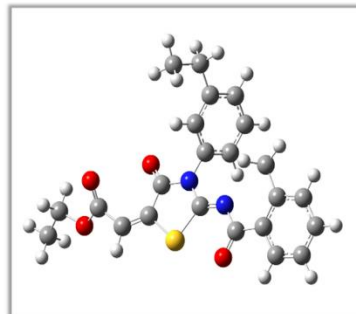

6c

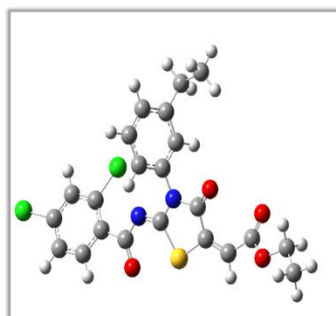

6d

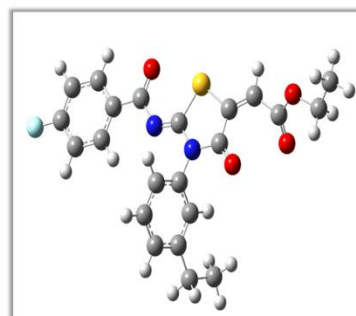

6f

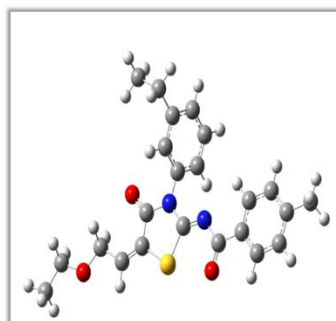

6h

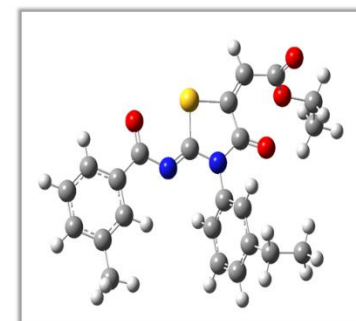

6i

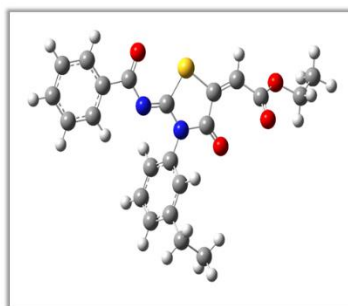

6j

*Figure S30. Showing the optimized structure of remaining compounds*

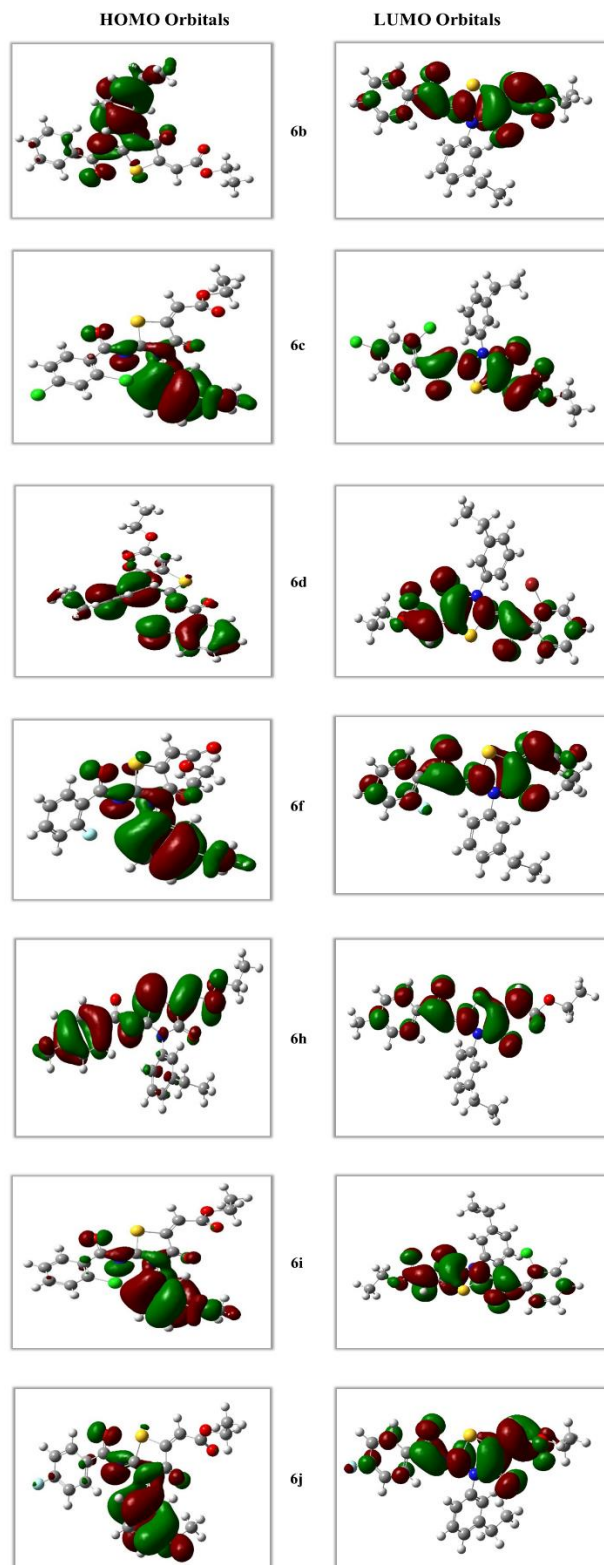

*Figure S31. Representing the HOMO-LUMO Visualization*

## Molecular Docking studies

The compound **6f** and **6h** also demonstrate potential interactions including hydrogen bonding. However, the number of alkyl interactions found in **6f** are less than **6g** and **6e** making it less potent. It can be concluded that this Pi-Cation interaction is responsible for higher activities of **6e** and **6g**. Compounds **6h**, **6i** and **6j** showed comparable bonding pattern up to some extent reflecting their equipotency towards carbonic anhydrase inhibition potency. In compounds, **6c**, **6j** and **6i** carbonyl oxygen formed two hydrogen bonds with amino acid residue THR 199 and THR 200, while in compounds **6b**, **6h** and **6j** alkyl interactions involving amino acid residues HIS94; HIS119; VAL121; VAL143; and TRP209 were observed. However in **6i**, a metal acceptor interaction between oxygen atom of ethoxy group present at the terminal position and Zn atom was also formed contributing to stability of ligand protein binding. In compound **6d**, Pi-Alkyl interactions of aromatic and thiazolidine rings was contributing the stability of ligand protein complex.

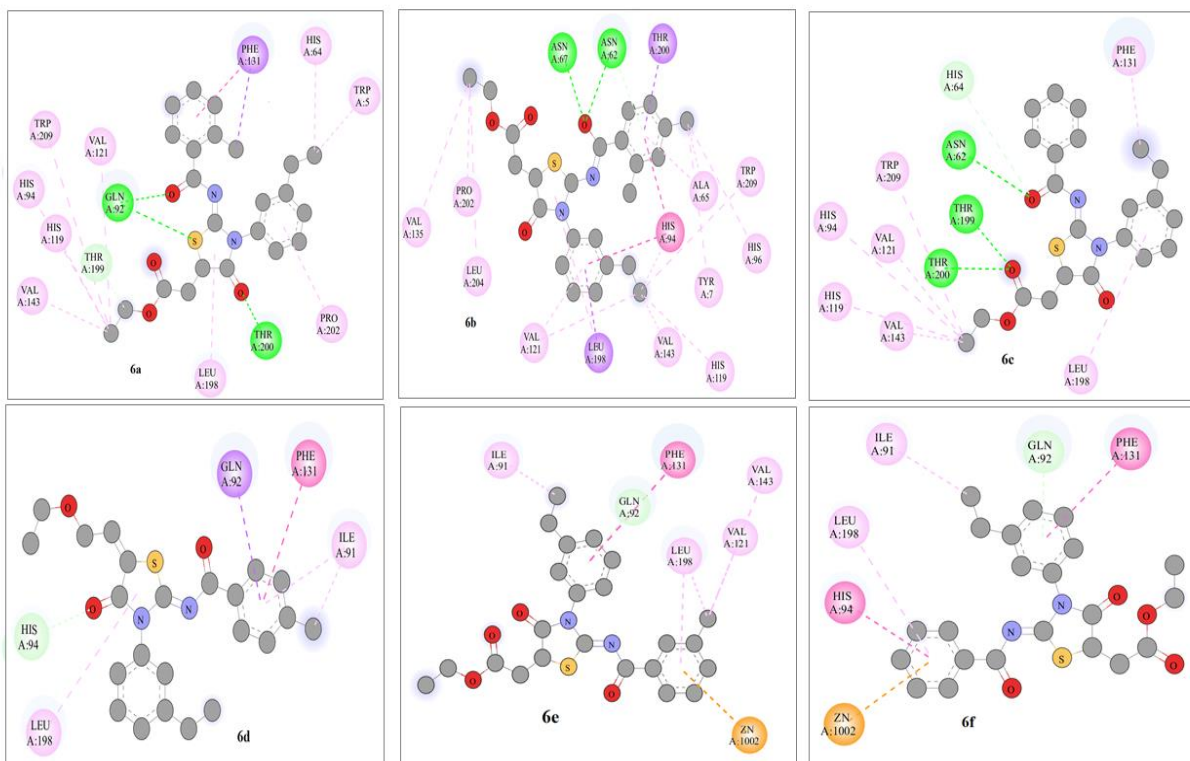

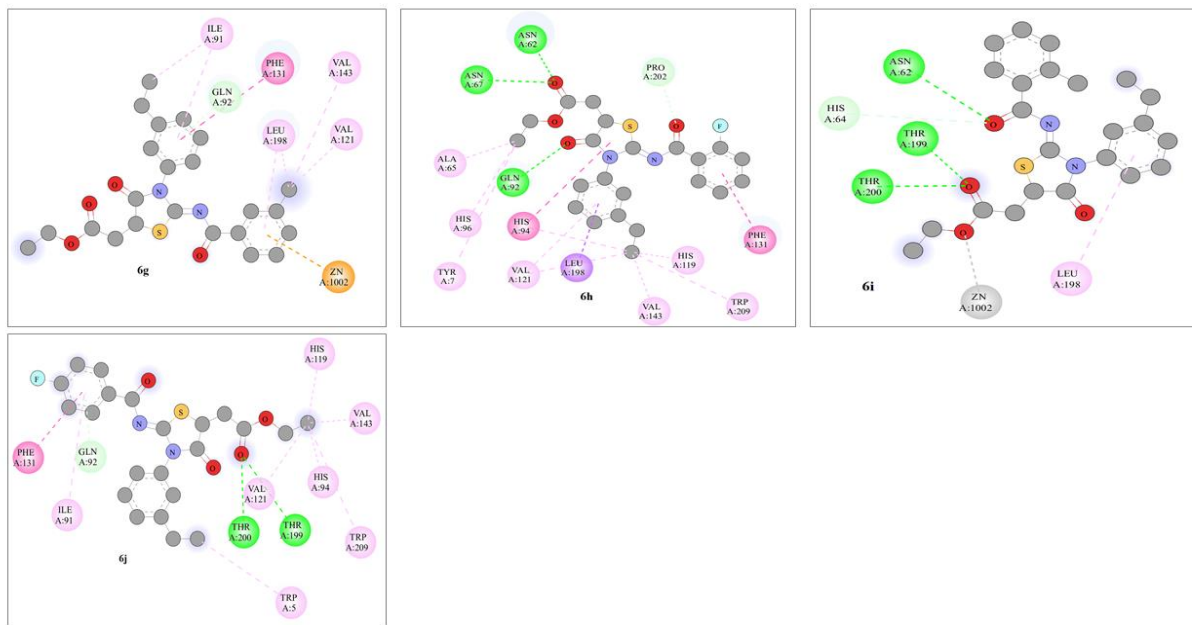

*Figure S32. Molecular interactions of synthesized derivatives*

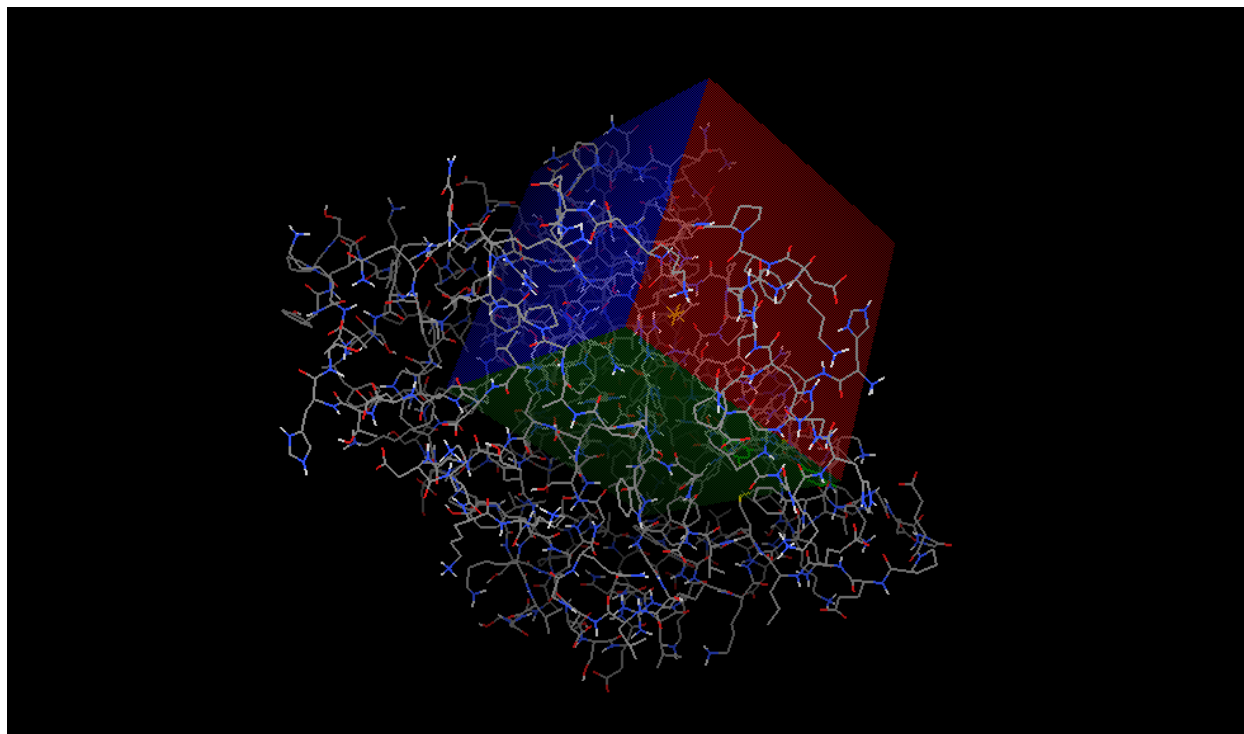

*Figure S33. Grid box*

**Table S1** Corelation of the computational results and experimental data

Correlation coefficient was identified using statistical package of social sciences and found statistically significant as there is significant positive relationship between in-vitro activity and computational activities of compound. For example, compound **6a**, **6e** and **6g** had strong in-vitro activities and ultimately there is high docking scores obtained from computational work.

SUMMARY  
OUTPUT

| <i>Regression Statistics</i> |         |
|------------------------------|---------|
|                              | 0.98257 |
| Multiple R                   | 6       |
|                              | 0.96545 |
| R Square                     | 5       |
| Adjusted R                   |         |
| Square                       | 0.95394 |
| Standard                     | 0.80429 |
| Error                        | 7       |
| Observations                 | 5       |

| ANOVA      |           |           |              |                 | <i>Significa</i> |
|------------|-----------|-----------|--------------|-----------------|------------------|
|            | <i>df</i> | <i>SS</i> | <i>MS</i>    | <i>F</i>        | <i>nance F</i>   |
| Regression | 1         | 54.23804  | 54.23<br>804 | 83.8437<br>5638 | 0.002754         |
| Residual   | 3         | 1.940683  | 0.646<br>894 |                 |                  |
| Total      | 4         | 56.17872  |              |                 |                  |

|           | <i>Coeffici</i> | <i>Standard</i> |               |                 | <i>Lower</i> | <i>Upper</i> | <i>Lower</i> | <i>Upper</i> |
|-----------|-----------------|-----------------|---------------|-----------------|--------------|--------------|--------------|--------------|
|           | <i>ents</i>     | <i>Error</i>    | <i>t Stat</i> | <i>P-value</i>  | <i>95%</i>   | <i>95%</i>   | <i>95.0%</i> | <i>95.0%</i> |
|           | -               |                 | -             |                 |              |              | -            |              |
| Intercept | 6.52814         | 0.423915        | 15.39<br>96   | 0.00059<br>4822 | -7.87722     | 5.17905      | 7.8772<br>2  | -5.17905     |
| in-vitro  | 0.14365         |                 | 9.156         | 0.00275         |              | 0.19358      | 0.0937       | 0.19358      |
| activity  | 4               | 0.015689        | 624           | 3752            | 0.093726     | 2            | 26           | 2            |
